# Supplementary material for: SplintR ligation-triggered in-situ rolling circle amplification on magnetic bead for accurate detection of circulating microRNAs
Source: PeerJ. 2025 Mar 11;13:e19082. doi: 10.7717/peerj.19082 (PMC11908441; doi:10.7717/peerj.19082)
Supplement: Supplemental Information 38 — Different concentrations (1uM,_200nM,_10nM). [file peerj-13-19082-s038.xlsx]

## Sheet: Fluorescence Spectrum
Detection Results
New Program.skax
2022/5/7 15:28:52
Fluorescence Spectrum 1
Em 520-620 nm，Ex 488 nm
Plate 1
	1um+	1um+	1um+	1um-	200nm+	200nm+	200nm+	200nm-	10nm+	10nm+	10nm+	10nm-
Wavelength	Blank1 (A05)	Blank1 (A06)	Blank1 (A07)	Blank1 (A08)	Blank1 (B05)	Blank1 (B06)	Blank1 (B07)	Blank1 (B08)	Blank1 (C05)	Blank1 (C06)	Blank1 (C07)	Blank1 (C08)
520	0.2802	0.2394	0.2379	0.2194	0.1791	0.1282	0.1154	0.1443	0.1234	0.1654	0.153	0.1201
521	0.2416	0.2408	0.2641	0.195	0.16	0.1153	0.1458	0.1352	0.09669	0.1391	0.1623	0.1451
522	0.2145	0.2618	0.2667	0.267	0.1385	0.1453	0.1758	0.08758	0.1851	0.13	0.1795	0.1687
523	0.3234	0.2683	0.3023	0.2641	0.1801	0.1728	0.1542	0.1573	0.1507	0.1783	0.1422	0.1036
524	0.2608	0.2578	0.2771	0.2638	0.1663	0.145	0.1788	0.1153	0.1581	0.1759	0.1735	0.1455
525	0.3551	0.2268	0.2828	0.2754	0.1564	0.1415	0.1746	0.2034	0.1497	0.1915	0.1836	0.1428
526	0.2739	0.2517	0.2914	0.3272	0.1965	0.1676	0.1876	0.1156	0.1816	0.1722	0.242	0.1744
527	0.3243	0.342	0.2637	0.3313	0.2285	0.1541	0.1754	0.169	0.1989	0.1668	0.1844	0.1898
528	0.4266	0.3242	0.2944	0.277	0.22	0.189	0.171	0.1757	0.2418	0.2132	0.2719	0.187
529	0.4511	0.4093	0.4237	0.3139	0.175	0.1594	0.255	0.1576	0.2285	0.313	0.2278	0.2059
530	0.3115	0.3521	0.358	0.3649	0.2518	0.1521	0.173	0.1581	0.271	0.242	0.303	0.163
531	0.3678	0.3377	0.3297	0.2723	0.199	0.1955	0.1626	0.2206	0.2401	0.2645	0.2985	0.2037
532	0.5001	0.3542	0.3677	0.3384	0.242	0.2476	0.2024	0.2154	0.2439	0.2469	0.2787	0.2812
533	0.3836	0.3855	0.3547	0.3659	0.3023	0.2234	0.2066	0.2104	0.2474	0.2485	0.3728	0.1616
534	0.4946	0.4737	0.2557	0.2811	0.3014	0.2245	0.1422	0.1697	0.3189	0.3171	0.423	0.1749
535	0.5313	0.4617	0.4292	0.3301	0.3945	0.2286	0.1875	0.1624	0.3707	0.4148	0.4665	0.1998
536	0.5926	0.4796	0.419	0.3714	0.4185	0.2883	0.2039	0.1655	0.4697	0.4169	0.4509	0.1891
537	0.6084	0.4421	0.3805	0.2806	0.4471	0.2772	0.2524	0.121	0.3728	0.4906	0.5614	0.2101
538	0.6861	0.4627	0.3975	0.3099	0.6082	0.2811	0.2481	0.1566	0.4394	0.6109	0.6597	0.2163
539	0.688	0.604	0.536	0.3203	0.6213	0.3906	0.213	0.1572	0.5964	0.7047	0.7831	0.1976
540	0.9442	0.6341	0.5953	0.3577	0.6909	0.3718	0.2839	0.177	0.7773	0.697	0.9716	0.1627
541	0.9709	0.6098	0.5558	0.3602	0.83	0.4803	0.2706	0.145	0.917	0.9151	1.117	0.1829
542	1.122	0.7592	0.6675	0.3105	1.043	0.5407	0.3447	0.1852	0.9863	1.262	1.549	0.2051
543	1.431	0.8738	0.7376	0.2994	1.199	0.7071	0.3827	0.1266	1.443	1.435	1.473	0.17
544	1.719	1.044	0.7565	0.3472	1.297	0.7471	0.4316	0.1544	1.426	1.581	2.004	0.2308
545	2.027	1.116	0.9727	0.3132	1.689	0.7602	0.4692	0.1906	1.746	2.002	2.121	0.228
546	2.491	1.415	1.078	0.351	1.995	1.055	0.6283	0.1623	2.035	2.212	2.81	0.1729
547	2.753	1.498	1.198	0.3865	2.321	1.152	0.6266	0.1436	2.578	2.804	3.155	0.3411
548	3.166	1.622	1.393	0.3547	2.961	1.332	0.91	0.1308	3.063	3.189	4.005	0.2769
549	3.789	2.375	1.548	0.3908	3.354	1.552	0.9064	0.1566	3.509	3.781	4.379	0.3075
550	4.147	2.445	1.828	0.4648	3.914	1.593	1.069	0.2283	4.062	4.377	5.422	0.2964
551	4.62	2.537	1.962	0.5046	4.392	2.02	1.084	0.1952	4.687	5.029	5.976	0.3493
552	5.729	3.202	2.469	0.5119	5.506	2.358	1.361	0.2394	5.807	5.697	7.421	0.44
553	6.153	3.449	2.566	0.4484	5.954	2.654	1.555	0.2414	6.08	6.785	8.224	0.4784
554	6.988	3.755	3.103	0.4894	7.009	3.083	1.709	0.1757	7.231	7.252	9.608	0.5311
555	7.775	4.715	3.468	0.5272	8.097	3.33	2.008	0.2224	8.433	9.072	10.69	0.5578
556	8.984	5.016	3.728	0.4764	9.176	3.911	2.042	0.23	9.1	9.633	12.19	0.6287
557	9.82	5.093	4.47	0.5419	9.643	4.166	2.298	0.2094	10.28	10.48	13	0.7003
558	10.89	5.884	4.719	0.5043	11.11	4.809	2.487	0.3212	10.87	12.11	14.87	0.6595
559	11.77	6.218	5.144	0.5716	11.72	4.848	2.813	0.3522	12.38	13.65	15.98	0.8556
560	12.85	7.278	5.389	0.723	12.78	5.646	3.279	0.2872	12.86	14.47	16.86	0.7821
561	14.15	7.302	5.559	0.6186	13.76	5.587	3.464	0.2811	14.53	15.19	18.54	0.8558
562	15.01	8.039	5.918	0.6729	14.64	6.141	3.425	0.3077	15.16	16.05	20.19	0.8615
563	15.46	8.66	6.312	0.6493	15.45	6.759	3.804	0.2797	15.67	17.42	20.94	1.04
564	16.16	8.632	6.723	0.6905	16.72	6.833	3.995	0.3052	16.94	18.8	22.67	1.011
565	17.55	8.902	7.019	0.7384	17.65	7.505	3.986	0.418	17.26	19.34	23.34	1.071
566	17.96	9.502	7.327	0.753	17.92	7.518	4.312	0.3866	18.28	19.31	24.38	1.055
567	18.45	10.27	7.284	0.8197	18.6	7.707	4.385	0.4504	18.85	20.68	24.4	1.138
568	18.93	10.16	7.88	0.7184	19.44	7.619	4.641	0.4627	19.46	21.19	25.19	1.189
569	19.51	9.921	7.86	0.8406	19.39	8.042	4.64	0.4681	19.58	21.04	26.47	1.238
570	19.2	10.47	7.958	0.7862	19.77	7.928	4.673	0.4637	20.31	22.02	26.24	1.16
571	18.98	9.995	7.941	0.8714	19.74	8.173	4.484	0.3716	19.72	21.86	26.44	1.243
572	19.53	10.24	7.861	0.6542	19.33	7.902	4.714	0.4299	19.27	21.52	26.06	1.155
573	19.19	9.67	7.913	0.8374	19.44	8.365	4.682	0.4522	20.03	21.92	25.91	1.234
574	18.93	10.05	7.529	0.6641	18.99	8.041	4.615	0.35	19.46	21.37	24.87	1.134
575	18.25	9.758	7.932	0.676	19.02	8.226	4.225	0.4224	18.91	21.15	24.82	1.207
576	17.81	10.11	7.471	0.8807	18.45	7.67	4.534	0.3345	18.66	20.32	25.14	1.188
577	17.18	9.519	7.228	0.7932	17.85	7.505	4.307	0.4545	17.92	19.32	23.63	1.049
578	17.6	8.818	6.974	0.6451	17.68	7.441	4.143	0.425	17.85	18.7	22.47	1.199
579	16.25	8.772	6.721	0.7084	17.2	7.289	3.81	0.4803	16.38	18.44	22.28	1.318
580	15.97	8.699	6.826	0.7369	16.88	6.891	3.576	0.3656	16.46	17.77	21.38	1.185
581	15.27	7.836	6.262	0.7643	15.42	6.372	3.638	0.4233	15.51	16.96	20.42	1.051
582	14.55	7.812	6.157	0.732	15.24	6.467	3.494	0.397	15.12	15.96	19.76	0.968
583	13.71	7.853	6.17	0.6623	14.6	6.078	3.601	0.3435	14.14	15.8	18.7	0.9796
584	13.65	7.711	5.275	0.6836	13.76	5.925	3.35	0.3881	14.02	15.07	18.06	1.004
585	13.25	7.018	5.412	0.7321	13.05	5.51	3.111	0.3788	12.79	14.31	17.3	0.9739
586	11.9	6.685	5.171	0.8923	12.8	5.227	2.921	0.2608	12.57	13.48	16.61	0.8841
587	11.64	6.292	5.12	0.4741	12.06	4.956	2.943	0.3384	11.93	12.88	15.85	0.7834
588	10.71	6.236	4.52	0.6857	11.93	4.592	3.028	0.3624	11.6	12.39	14.9	0.7242
589	10.67	6.183	4.651	0.6093	11.23	4.51	2.416	0.2668	11.17	12.05	14.13	0.8765
590	9.833	5.661	4.276	0.5898	10.4	4.517	2.685	0.2824	10.54	11.08	13.36	0.6639
591	9.32	5.33	4.046	0.527	9.315	4.073	2.227	0.289	10.24	10.39	13	0.6739
592	9.183	5.065	3.684	0.5129	9.463	3.731	2.252	0.3075	9.632	10.3	12.56	0.7388
593	8.833	4.946	3.579	0.4948	9.313	3.762	2.096	0.2455	8.835	9.4	11.96	0.6854
594	8.665	4.458	3.622	0.5779	8.666	3.612	2.221	0.1933	8.486	9.051	11.09	0.6815
595	7.865	4.405	3.316	0.5036	8.669	3.325	2.014	0.2422	7.969	8.977	10.96	0.6314
596	7.729	4.098	3.232	0.4248	7.824	3.206	1.931	0.2044	8.03	8.704	10.32	0.5693
597	7.392	3.909	3.084	0.5955	7.896	3.237	1.928	0.2189	7.468	8.109	9.83	0.4527
598	7.036	3.942	3.03	0.473	7.195	3.158	1.773	0.1699	6.882	7.789	9.508	0.4839
599	6.671	3.764	2.915	0.397	6.8	2.857	1.671	0.1546	6.75	7.429	9.227	0.4901
600	6.455	3.431	2.742	0.4651	6.722	2.582	1.591	0.2418	6.505	7.094	8.541	0.3824
601	6.752	3.472	2.619	0.4368	6.207	2.533	1.595	0.2111	6.786	6.686	8.422	0.5035
602	6.083	3.237	2.746	0.3938	6.296	2.483	1.45	0.1919	6.011	6.576	8.171	0.3931
603	5.923	3.223	2.413	0.3435	6.054	2.443	1.503	0.1823	5.836	6.079	7.64	0.3868
604	5.675	3.227	2.664	0.402	5.824	2.531	1.588	0.1787	5.997	6.152	7.254	0.312
605	5.566	3.101	2.459	0.4512	5.815	2.344	1.32	0.1877	5.744	6.14	7.622	0.32
606	5.483	2.864	2.369	0.3997	5.446	2.412	1.158	0.1785	5.386	6.339	7.069	0.3474
607	5.141	2.913	2.213	0.3374	5.657	2.22	1.413	0.1569	5.617	5.72	7.543	0.3751
608	5.112	3.079	2.105	0.4033	5.352	2.18	1.175	0.1351	5.263	5.784	6.956	0.3792
609	5.062	2.902	2.26	0.3936	5.092	2.124	1.222	0.1441	5.274	5.566	6.753	0.3515
610	4.941	3.044	2.084	0.4267	5.5	2.171	1.211	0.1159	5.22	5.345	6.629	0.3502
611	4.798	2.763	2.022	0.403	5.331	2.161	1.214	0.1054	4.907	5.366	6.598	0.2718
612	4.548	2.831	2.043	0.4223	5.08	1.789	1.345	0.1192	4.966	5.32	6.483	0.2965
613	4.983	2.518	2.129	0.4753	4.974	1.966	1.161	0.1007	4.964	5.192	6.711	0.2887
614	4.762	2.778	1.945	0.3809	5.33	1.984	1.184	0.1246	4.661	5.001	6.23	0.2843
615	4.67	2.732	1.973	0.3911	4.864	2.036	1.109	0.1185	4.522	5.087	5.919	0.3833
616	4.672	2.687	2.124	0.4333	4.905	1.947	1.306	0.1879	4.607	4.953	5.763	0.311
617	4.443	2.782	1.836	0.3716	4.792	1.768	1.166	0.1017	4.704	5.051	6.191	0.2591
618	4.712	2.521	1.917	0.5134	4.793	1.854	1.029	0.1244	4.581	4.88	6.121	0.394
619	4.368	2.382	1.969	0.4393	4.148	1.95	1.005	0.109	4.777	4.521	6.075	0.3147
620	4.368	2.343	1.885	0.3553	4.604	1.763	0.997	0.1088	4.158	4.629	5.994	0.338
Auto Load Range A1 - M113

## Sheet: Result Summary
Result Overview
No Summary

## Sheet: Basic Information
Basic Information
	Software Version			SkanIt Software 6.1 RE for Microplate Readers RE, ver. 6.1.0.51

## Sheet: Program Information
Program Information
	Program Name			New Program.skax
	Session Comments
	Software Version			SkanIt Software RE for Microplate Readers RE, ver. 6.1.0.51
	Execution Time			2022/5/7 15:28:52
	User			DESKTOP-BK9BVR7\JYK

## Sheet: Instrument Information
Instrument Information
	Name			Varioskan LUX
	ESW Version			1.00.38
	Optical Response Compensation			yes
	Serial Number			3020-81063
	Instrument Module/Component
	Filter
		Name of Optical Component		New filter
		Position of Optical Component		1
		Wavelength		620
		Bandwidth		10
		Definition Date and Time		2021/9/8 16:05:00
	Filter
		Name of Optical Component		New filter
		Position of Optical Component		2
		Wavelength		655
		Bandwidth		10
		Definition Date and Time		2021/9/8 16:05:00
		Module Name		LAT Module
		Module Serial Number		LL2106802
		Module Name		TRF Module
		Module Serial Number		LT210602
		Adapter Name for Plate		96-well adapter for plate without lid
		Adapter Number for Plate		2
		Incubator		yes
		Gas Control		no
		Top Optical Component		yes
		Bottom Optical Component		yes
		Pipette / Liquid Handler		yes

## Sheet: Program Settings
Program Settings
	Measurement Sequence			3
	Start-up Stabilization Delay			yes
	Temperature Check at Start [°C]			no
Fluorescence Spectrum 1
	Type			Emission Spectrum
	Wavelength Range
		Start [nm]		520
		End [nm]		620
		Step [nm]		1
	Fitting Wavelength			488
	Light Path			Top Read
	Excitation Bandwidth [nm]			5
	Dynamic Range			Automatic
	Measurement Time [ms]			100

## Sheet: Run Log
Run Log
	Time	Event	Message
	2022/5/7 15:28:52	Program New Program.skax Started
	2022/5/7 15:28:52	Temperature	25.3°C
	2022/5/7 15:28:52	Step Fluorescence Spectrum 1 Started
	2022/5/7 15:28:57	Calibration	1.04738 18885
	2022/5/7 15:29:30	Temperature	25.3°C
	2022/5/7 15:30:30	Temperature	25.4°C
	2022/5/7 15:31:30	Temperature	25.4°C
	2022/5/7 15:31:47	Step Fluorescence Spectrum 1 Ended
	2022/5/7 15:31:47	Step Oscillation 1 has started
	2022/5/7 15:31:52	Step Oscillation 1 has ended
	2022/5/7 15:31:52	Temperature	25.4°C
	2022/5/7 15:32:03	Program New Program.skax Ended

## Sheet: Plate and Sample
Name	Plate 1
Plate Template	ANSI/SBS Standard, 96-well
	1	2	3	4	5	6	7	8	9	10	11	12
A					Blank1	Blank1	Blank1	Blank1
					Group 1	Group 1	Group 1	Group 1
B					Blank1	Blank1	Blank1	Blank1
					Group 1	Group 1	Group 1	Group 1
C					Blank1	Blank1	Blank1	Blank1
					Group 1	Group 1	Group 1	Group 1
D
E
F
G
H
