# Supplementary material for: SplintR ligation-triggered in-situ rolling circle amplification on magnetic bead for accurate detection of circulating microRNAs
Source: PeerJ. 2025 Mar 11;13:e19082. doi: 10.7717/peerj.19082 (PMC11908441; doi:10.7717/peerj.19082)
Supplement: Supplemental Information 39 [file peerj-13-19082-s039.xlsx]

## Sheet: Fluorescence Spectrum
Detection Results
2022.3.18.skax
2022/3/18 17:01:09
Fluorescence Spectrum 1
Em 490-600 nm，Ex 488 nm
Plate 1
	Negative	splintR 0.5h	splintR 1h	splintR 1.5h	splintR 2h	splintR 3h
Wavelength	Blank1 (A01)	Blank1 (A02)	Blank1 (B01)	Blank1 (B02)	Blank1 (C01)	Blank1 (C02)
490	167700	103100	152200	155600	124700	289500
491	165200	103500	153500	154900	126400	294800
492	161400	100500	148900	147900	123400	286700
493	149000	94610	139500	135900	116300	267500
494	133100	84810	125200	120500	104600	237800
495	107400	68730	102600	95090	85650	190300
496	83190	54250	81470	72370	67780	147000
497	60600	39900	60950	51720	50520	104300
498	40480	27050	41480	33700	34880	67540
499	21110	14360	22650	17610	18340	33680
500	11080	7628	12850	8894	10410	17340
501	4880	3311	6053	3918	4933	7351
502	1653	1259	2317	1313	1819	2438
503	256.9	214.6	434.2	211.8	354.1	412.7
504	52.59	43.74	82.67	49.42	75.44	108.4
505	15.25	12.31	21.13	16.76	21.56	52.42
506	4.758	4.583	7.079	8.397	10.48	40.52
507	1.123	2.236	3.908	6.062	7.578	39.84
508	0.7243	1.874	3.342	5.71	7.125	40.33
509	0.5476	2.032	3.451	6.303	7.908	43.59
510	0.5418	2.016	3.443	6.272	8.683	45.89
511	0.5951	2.286	3.498	6.617	8.674	48.11
512	0.52	2.369	3.897	6.967	9.167	50.88
513	0.5691	2.441	3.948	7.255	9.44	52.82
514	0.6449	2.494	4.179	7.689	9.79	53.97
515	0.6683	2.696	4.31	8.031	9.954	56.81
516	0.6746	2.576	4.576	8.286	10.16	57.52
517	0.84	2.707	4.546	8.295	10.68	57.68
518	0.6637	2.629	4.635	8.351	10.74	59.89
519	0.7772	2.68	4.674	8.271	11.01	60.81
520	0.7746	2.805	4.651	8.302	11.23	62.19
521	0.5965	2.879	4.615	8.63	10.93	61.27
522	0.7116	2.798	4.606	8.57	11.03	62.16
523	0.7063	2.92	4.588	8.655	10.86	61.49
524	0.8664	2.921	4.573	8.433	10.93	61.36
525	0.8296	2.649	4.68	8.593	11.2	61
526	0.724	2.583	4.663	8.529	10.52	59.51
527	0.7358	2.737	4.556	8.367	10.75	59.4
528	0.7136	2.838	4.623	8.13	10.39	59.07
529	0.7063	2.848	4.477	7.967	10.18	58.84
530	0.7127	2.503	4.467	8.188	10.38	57.16
531	0.7231	2.567	4.214	7.742	10.19	56.4
532	0.6632	2.717	4.194	7.431	10.22	56.18
533	0.7651	2.609	4.278	7.396	9.841	54.36
534	0.6673	2.311	4.14	7.269	9.239	53.06
535	0.6267	2.276	4.001	7.319	9.476	52.51
536	0.6545	2.465	3.984	7.309	9.102	50.5
537	0.6292	2.201	3.91	7.07	9.376	49.99
538	0.6025	2.262	3.686	6.775	8.932	48.13
539	0.7111	2.219	3.573	6.635	8.523	46.89
540	0.5719	1.998	3.717	6.647	8.601	46.43
541	0.6496	2.049	3.522	6.064	8.42	44.46
542	0.612	2.057	3.181	6.189	7.922	43.88
543	0.677	2.154	3.134	6.168	7.496	42.22
544	0.5268	1.925	3.265	5.727	7.726	41.05
545	0.5026	1.902	3.32	5.448	7.068	40.17
546	0.5047	1.706	3.131	5.511	7.284	38.72
547	0.5072	1.772	2.835	5.189	6.677	38.59
548	0.5768	1.726	2.84	5.504	6.836	37.35
549	0.4449	1.71	2.874	5.328	6.522	36.47
550	0.4384	1.646	2.806	4.793	6.541	35.97
551	0.4859	1.554	2.491	5.308	6.442	34.15
552	0.421	1.756	2.635	4.923	5.739	33.34
553	0.4557	1.58	2.789	4.93	5.984	32.92
554	0.409	1.583	2.517	4.658	6.128	32.03
555	0.4362	1.497	2.431	4.433	5.883	30.96
556	0.462	1.414	2.219	4.28	5.499	30.04
557	0.3982	1.323	2.409	4.318	5.379	29.31
558	0.4052	1.31	2.102	4.138	5.407	28.75
559	0.4298	1.473	2.341	3.657	4.985	28.01
560	0.3953	1.23	2.109	3.896	4.958	27.94
561	0.384	1.242	2.084	3.652	4.717	27.22
562	0.2962	1.207	2.213	3.712	4.898	26.18
563	0.4303	1.213	1.86	3.724	4.551	25.68
564	0.2697	1.015	1.929	3.513	4.31	24.69
565	0.4362	1.053	1.899	3.543	4.216	23.99
566	0.3529	1.085	1.873	3.434	4.196	23.45
567	0.3066	0.9913	1.833	3.265	4.118	23.05
568	0.3016	1.031	1.712	3.446	4.047	22.5
569	0.3889	1.085	1.65	2.98	3.569	21.52
570	0.3288	1.084	1.57	3.086	3.845	20.98
571	0.2616	0.939	1.539	2.919	3.965	20.34
572	0.3443	0.887	1.451	2.693	3.383	19.61
573	0.2513	0.9023	1.573	2.758	3.408	19.34
574	0.3304	0.876	1.526	2.65	3.518	17.9
575	0.2151	0.7846	1.549	2.675	3.136	17.81
576	0.2903	0.8	1.29	2.466	3.212	17.39
577	0.2867	0.8344	1.375	2.406	3.182	16.76
578	0.2849	0.8262	1.247	2.277	3.011	16.27
579	0.2865	0.8178	1.164	2.365	2.953	15.92
580	0.2126	0.7494	1.276	2.133	2.902	15.37
581	0.2188	0.7478	1.042	2.296	2.631	14.91
582	0.258	0.7992	1.124	1.977	2.568	14.45
583	0.2418	0.6336	1.007	2.143	2.473	14.07
584	0.3326	0.7151	1.026	1.881	2.531	13.17
585	0.2245	0.5891	1.075	1.762	2.49	13.15
586	0.213	0.7142	1.136	1.929	2.052	12.73
587	0.1995	0.6996	0.9787	1.681	2.107	11.94
588	0.1755	0.5177	1.016	1.754	2.093	11.56
589	0.1549	0.6263	0.9675	1.528	2.187	11.68
590	0.2192	0.5823	0.8088	1.72	1.93	11.3
591	0.2434	0.5266	0.8266	1.461	2.038	10.45
592	0.1703	0.4933	0.8455	1.699	2.044	10.16
593	0.1401	0.582	0.8838	1.315	1.763	10.2
594	0.1849	0.4562	0.8233	1.33	1.779	9.794
595	0.132	0.5131	0.8044	1.388	1.795	9.442
596	0.1523	0.4097	0.7151	1.345	1.622	8.951
597	0.1692	0.4404	0.6291	1.3	1.65	8.703
598	0.1461	0.4663	0.5855	1.231	1.566	8.136
599	0.2379	0.4158	0.6677	1.171	1.578	8.165
600	0.114	0.4215	0.6818	1.21	1.418	7.955
	167700	103500	153500	155600	126400	294800
Auto Load Range A1 - G123

## Sheet: Result Summary
Result Overview
No Summary

## Sheet: Basic Information
Basic Information
	Software Version			SkanIt Software 6.1 RE for Microplate Readers RE, ver. 6.1.0.51

## Sheet: Program Information
Program Information
	Program Name			2022.3.18.skax
	Session Comments
	Software Version			SkanIt Software RE for Microplate Readers RE, ver. 6.1.0.51
	Execution Time			2022/3/18 17:01:09
	User			DESKTOP-BK9BVR7\JYK

## Sheet: Instrument Information
Instrument Information
	Name			Varioskan LUX
	ESW Version			1.00.38
	Optical Response Compensation			yes
	Serial Number			3020-81063
	Instrument Module/Component
	Filter
		Name of Optical Component		New filter
		Position of Optical Component		1
		Wavelength		620
		Bandwidth		10
		Definition Date and Time		2021/9/8 16:05:00
	Filter
		Name of Optical Component		New filter
		Position of Optical Component		2
		Wavelength		655
		Bandwidth		10
		Definition Date and Time		2021/9/8 16:05:00
		Module Name		LAT Module
		Module Serial Number		LL2106802
		Module Name		TRF Module
		Module Serial Number		LT210602
		Adapter Name for Plate		96-well adapter for plate without lid
		Adapter Number for Plate		2
		Incubator		yes
		Gas Control		no
		Top Optical Component		yes
		Bottom Optical Component		yes
		Pipette / Liquid Handler		yes

## Sheet: Program Settings
Program Settings
	Measurement Sequence			3
	Start-up Stabilization Delay			yes
	Temperature Check at Start [°C]			no
Fluorescence Spectrum 1
	Type			Emission Spectrum
	Wavelength Range
		Start [nm]		490
		End [nm]		600
		Step [nm]		1
	Fitting Wavelength			488
	Light Path			Top Read
	Excitation Bandwidth [nm]			5
	Dynamic Range			Automatic
	Measurement Time [ms]			100

## Sheet: Run Log
Run Log
	Time	Event	Message
	2022/3/18 17:01:09	Program New Program.skax Started
	2022/3/18 17:01:09	Temperature	22.7°C
	2022/3/18 17:01:10	Step Fluorescence Spectrum 1 Started
	2022/3/18 17:01:12	Temperature	22.7°C
	2022/3/18 17:01:16	Calibration	1.05625 379313
	2022/3/18 17:02:12	Temperature	22.7°C
	2022/3/18 17:02:56	Step Fluorescence Spectrum 1 Ended
	2022/3/18 17:02:57	Temperature	22.7°C
	2022/3/18 17:03:07	Program New Program.skax Ended

## Sheet: Plate and Sample
Name	Plate 1
Plate Template	ANSI/SBS Standard, 96-well
	1	2	3	4	5	6	7	8	9	10	11	12
A	Blank1	Blank1
	Group 1	Group 1
B	Blank1	Blank1
	Group 1	Group 1
C	Blank1	Blank1
	Group 1	Group 1
D
E
F
G
H
