# Supplementary material for: SplintR ligation-triggered in-situ rolling circle amplification on magnetic bead for accurate detection of circulating microRNAs
Source: PeerJ. 2025 Mar 11;13:e19082. doi: 10.7717/peerj.19082 (PMC11908441; doi:10.7717/peerj.19082)
Supplement: Supplemental Information 40 [file peerj-13-19082-s040.xlsx]

## Sheet: Fluorescence Spectrum
Detection Results
New Program.skax
2022/3/17 19:48:14
Fluorescence Spectrum 1
Em 557-600 nm，Ex 556 nm
Plate 1
	Negative	splintR 1.5h	splintR 2h
Wavelength	Blank1 (D01)	Blank1 (D02)	Blank1 (D03)
557	143000	17210	29320
558	156600	17010	31750
559	165000	16420	33080
560	169000	15450	33850
561	163500	13590	33780
562	150800	11730	31970
563	132000	9665	28160
564	101000	7004	22160
565	76210	5109	17070
566	50840	3421	11970
567	26170	1931	6259
568	12950	1135	2972
569	4107	536.3	890.4
570	1205	288.1	346.1
571	366.7	162.7	178.6
572	190	99.31	107.8
573	158.8	82.42	86.15
574	142.8	74.55	76.65
575	138.1	70.42	73.95
576	136.1	71.19	73.16
577	132.2	67.24	73.48
578	125.8	65.69	66.1
579	121.5	61.24	65.45
580	117.3	60.36	63.02
581	113	58.54	62.45
582	107.7	56.82	59.51
583	104.6	53.53	55.07
584	100.5	51.48	53.87
585	98.07	48.22	49.68
586	91.12	48.76	51.06
587	86.48	44.27	47.5
588	82.05	41.9	44.21
589	80.93	41.64	44.24
590	73.37	39.45	40.93
591	70.96	37.59	40.1
592	69.66	34.63	36.65
593	64.47	34.02	33.69
594	62.83	32.79	34.01
595	57.72	32.43	32.03
596	58.06	29.63	30.6
597	54.64	28.55	30.04
598	51.93	27.25	28.67
599	49.14	24.11	26.7
600	48.88	25.32	26.73
	169000	17210	33850
Auto Load Range A1 - D56

## Sheet: Result Summary
Result Overview
No Summary

## Sheet: Basic Information
Basic Information
	Software Version			SkanIt Software 6.1 RE for Microplate Readers RE, ver. 6.1.0.51

## Sheet: Program Information
Program Information
	Program Name			New Program.skax
	Session Comments
	Software Version			SkanIt Software RE for Microplate Readers RE, ver. 6.1.0.51
	Execution Time			2022/3/17 19:48:14
	User			DESKTOP-BK9BVR7\JYK

## Sheet: Instrument Information
Instrument Information
	Name			Varioskan LUX
	ESW Version			1.00.38
	Optical Response Compensation			yes
	Serial Number			3020-81063
	Instrument Module/Component
	Filter
		Name of Optical Component		New filter
		Position of Optical Component		1
		Wavelength		620
		Bandwidth		10
		Definition Date and Time		2021/9/8 16:05:00
	Filter
		Name of Optical Component		New filter
		Position of Optical Component		2
		Wavelength		655
		Bandwidth		10
		Definition Date and Time		2021/9/8 16:05:00
		Module Name		LAT Module
		Module Serial Number		LL2106802
		Module Name		TRF Module
		Module Serial Number		LT210602
		Adapter Name for Plate		96-well adapter for plate without lid
		Adapter Number for Plate		2
		Incubator		yes
		Gas Control		no
		Top Optical Component		yes
		Bottom Optical Component		yes
		Pipette / Liquid Handler		yes

## Sheet: Program Settings
Program Settings
	Measurement Sequence			3
	Start-up Stabilization Delay			yes
	Temperature Check at Start [°C]			no
Fluorescence Spectrum 1
	Type			Emission Spectrum
	Wavelength Range
		Start [nm]		557
		End [nm]		600
		Step [nm]		1
	Fitting Wavelength			556
	Light Path			Top Read
	Excitation Bandwidth [nm]			5
	Dynamic Range			Automatic
	Measurement Time [ms]			100

## Sheet: Run Log
Run Log
	Time	Event	Message
	2022/3/17 19:48:14	Program New Program.skax Started
	2022/3/17 19:48:14	Temperature	23.8°C
	2022/3/17 19:48:15	Step Fluorescence Spectrum 1 Started
	2022/3/17 19:48:38	Step Fluorescence Spectrum 1 Ended
	2022/3/17 19:48:38	Temperature	23.8°C
	2022/3/17 19:48:48	Program New Program.skax Ended

## Sheet: Plate and Sample
Name	Plate 1
Plate Template	ANSI/SBS Standard, 96-well
	1	2	3	4	5	6	7	8	9	10	11	12
A
B
C
D	Blank1	Blank1	Blank1
	Group 1	Group 1	Group 1
E
F
G
H
