# Supplementary material for: SplintR ligation-triggered in-situ rolling circle amplification on magnetic bead for accurate detection of circulating microRNAs
Source: PeerJ. 2025 Mar 11;13:e19082. doi: 10.7717/peerj.19082 (PMC11908441; doi:10.7717/peerj.19082)
Supplement: Supplemental Information 41 [file peerj-13-19082-s041.xlsx]

## Sheet: Fluorescence Spectrum
Detection Results
New Program.skax
2022/3/17 19:46:23
Fluorescence Spectrum 1
Em 560-600 nm，Ex 556 nm
Plate 1
	Negative	splintR 1.5h	splintR 2h
Wavelength	Blank1 (D01)	Blank1 (D02)	Blank1 (D03)
560	202100	42710	171100
561	194800	45780	170200
562	180000	47970	161400
563	158000	46780	144300
564	123800	41510	115200
565	94290	35270	88550
566	67690	27980	63670
567	38500	18500	35100
568	21400	11160	18440
569	8080	4379	6218
570	2878	1528	1964
571	822.1	426	476.1
572	220.9	128	131.2
573	160.4	87.9	90.85
574	143.9	76.71	77.04
575	134.3	71.68	70.8
576	133.2	70.59	72.2
577	127.7	68.48	68.25
578	122.4	64.67	64.52
579	121.5	63.96	63.73
580	115.6	60.53	61.32
581	110.1	59.98	59.18
582	107.7	58.27	56.4
583	103	54.8	55.09
584	99.06	51.29	51.65
585	96.17	50.14	49.07
586	88.32	48.03	47.41
587	85.28	46.04	45.63
588	82.97	42.99	44.84
589	80.54	41.34	42.21
590	71.68	40.96	39.41
591	70.14	39.59	38.64
592	70.03	36.33	36.28
593	62.52	34.28	34.21
594	61.34	33.66	33.59
595	60.49	31.17	31.43
596	56.3	29.47	29.68
597	52.67	28.84	30.1
598	49.36	26.62	27.43
599	49.47	27.09	27.44
600	49.19	24.94	26.03
Auto Load Range A1 - D53

## Sheet: Result Summary
Result Overview
No Summary

## Sheet: Basic Information
Basic Information
	Software Version			SkanIt Software 6.1 RE for Microplate Readers RE, ver. 6.1.0.51

## Sheet: Program Information
Program Information
	Program Name			New Program.skax
	Session Comments
	Software Version			SkanIt Software RE for Microplate Readers RE, ver. 6.1.0.51
	Execution Time			2022/3/17 19:46:23
	User			DESKTOP-BK9BVR7\JYK

## Sheet: Instrument Information
Instrument Information
	Name			Varioskan LUX
	ESW Version			1.00.38
	Optical Response Compensation			yes
	Serial Number			3020-81063
	Instrument Module/Component
	Filter
		Name of Optical Component		New filter
		Position of Optical Component		1
		Wavelength		620
		Bandwidth		10
		Definition Date and Time		2021/9/8 16:05:00
	Filter
		Name of Optical Component		New filter
		Position of Optical Component		2
		Wavelength		655
		Bandwidth		10
		Definition Date and Time		2021/9/8 16:05:00
		Module Name		LAT Module
		Module Serial Number		LL2106802
		Module Name		TRF Module
		Module Serial Number		LT210602
		Adapter Name for Plate		96-well adapter for plate without lid
		Adapter Number for Plate		2
		Incubator		yes
		Gas Control		no
		Top Optical Component		yes
		Bottom Optical Component		yes
		Pipette / Liquid Handler		yes

## Sheet: Program Settings
Program Settings
	Measurement Sequence			3
	Start-up Stabilization Delay			yes
	Temperature Check at Start [°C]			no
Fluorescence Spectrum 1
	Type			Emission Spectrum
	Wavelength Range
		Start [nm]		560
		End [nm]		600
		Step [nm]		1
	Fitting Wavelength			556
	Light Path			Top Read
	Excitation Bandwidth [nm]			5
	Dynamic Range			Automatic
	Measurement Time [ms]			100

## Sheet: Run Log
Run Log
	Time	Event	Message
	2022/3/17 19:46:23	Program New Program.skax Started
	2022/3/17 19:46:23	Temperature	23.9°C
	2022/3/17 19:46:23	Step Fluorescence Spectrum 1 Started
	2022/3/17 19:46:28	Calibration	Fluorescence 1.04739 22717
	2022/3/17 19:46:50	Step Fluorescence Spectrum 1 Ended
	2022/3/17 19:46:50	Temperature	23.9°C
	2022/3/17 19:46:51	Temperature	23.9°C
	2022/3/17 19:47:00	Program New Program.skax Ended

## Sheet: Plate and Sample
Name	Plate 1
Plate Template	ANSI/SBS Standard, 96-well
	1	2	3	4	5	6	7	8	9	10	11	12
A
B
C
D	Blank1	Blank1	Blank1
	Group 1	Group 1	Group 1
E
F
G
H
