# Supplementary material for: SplintR ligation-triggered in-situ rolling circle amplification on magnetic bead for accurate detection of circulating microRNAs
Source: PeerJ. 2025 Mar 11;13:e19082. doi: 10.7717/peerj.19082 (PMC11908441; doi:10.7717/peerj.19082)
Supplement: Supplemental Information 42 [file peerj-13-19082-s042.xlsx]

## Sheet: Fluorescence Spectrum
Detection Results
New Program.skax
2022/3/21 20:48:39
Fluorescence Spectrum 1
Em 490-600 nm，Ex 450 nm
Plate 1
	Negative	0.5	0.5	0.5	1	1	1	1.5	1.5	1.5	2	2	2	3	3	3
Wavelength	Blank1 (D01)	Blank1 (D02)	Blank1 (D03)	Blank1 (D04)	Blank1 (D05)	Blank1 (D06)	Blank1 (D07)	Blank1 (D08)	Blank1 (D09)	VBlank (E01)	Blank1 (E02)	Blank1 (E03)	Blank1 (E04)	Blank1 (E05)	Blank1 (E06)	Blank1 (E07)
490	0.9558	1.628	1.027	1.214	2.55	1.245	1.058	1.459	2.475	1.237	1.577	1.673	1.073	0.8583	0.8665	1.524
491	0.9867	1.767	0.933	1.504	2.655	1.231	1.294	1.584	2.862	1.239	1.591	1.944	1.112	0.9783	1.057	1.525
492	1.168	2.319	1.132	1.753	3.425	1.516	1.502	2.034	3.619	1.365	2.123	2.236	1.314	1.118	1.144	1.77
493	1.206	2.538	1.226	1.919	3.933	1.511	1.608	2.426	3.917	1.626	2.153	2.34	1.451	1.08	1.266	2.075
494	1.316	2.896	1.222	1.981	4.338	1.597	1.814	2.694	4.435	1.812	2.549	2.785	1.609	1.387	1.464	2.207
495	1.589	3.194	1.514	2.301	5.149	1.969	1.793	2.988	5.257	1.88	2.757	3.216	1.911	1.464	1.593	2.593
496	1.802	3.421	1.501	2.649	5.803	2.232	2.086	3.171	5.722	2.141	3.193	3.534	1.871	1.603	1.752	3.092
497	1.87	3.838	1.759	2.907	6.417	2.272	2.277	3.519	6.396	2.464	3.614	3.847	2.195	1.81	1.92	3.152
498	1.987	4.44	1.829	3.17	6.842	2.659	2.663	3.835	7.385	2.619	3.719	4.392	2.592	1.885	2.233	3.731
499	2.234	4.82	2.025	3.646	8.008	2.877	3.014	4.539	8.425	3.022	4.337	4.969	2.684	2.309	2.356	4.086
500	2.404	5.138	2.197	3.909	8.927	3.298	3.434	4.772	9.244	3.126	4.736	5.642	3.142	2.273	2.53	4.646
501	2.483	5.711	2.445	4.372	9.907	3.546	3.592	5.332	10.23	3.506	5.274	6.111	3.246	2.355	2.847	4.906
502	2.777	6.277	2.51	4.789	10.7	3.614	3.95	5.622	11.08	4.043	5.893	6.372	3.611	2.571	2.929	5.365
503	3.168	6.902	2.648	5.18	11.66	4.148	4.536	6.363	12.36	4.276	6.233	7.165	3.827	3.05	3.399	5.809
504	3.495	7.58	3.114	5.535	13.22	4.585	4.494	7.05	13.39	4.433	7.21	8.062	4.176	3.223	3.528	6.229
505	3.591	7.674	3.282	5.717	13.39	4.805	4.897	7.505	14.33	4.665	7.751	8.316	4.733	3.191	3.788	6.694
506	3.616	8.342	3.284	6.365	14.62	5.091	5.323	8.169	15.66	5.354	8.064	9.262	4.895	3.487	3.916	7.392
507	3.892	9.287	3.577	6.874	16.23	5.449	5.675	8.886	16.75	5.48	8.575	10.13	5.279	3.733	4.213	7.703
508	4.248	9.668	3.95	7.172	16.95	5.619	6.227	9.184	18.38	5.912	9.23	10.82	5.538	4.423	4.596	8.586
509	4.518	10.01	4.104	7.618	17.55	6.246	6.391	9.645	19.01	5.931	9.865	11.34	5.798	4.195	4.728	9.086
510	4.624	11.04	4.203	7.989	18.52	6.577	6.866	9.587	19.92	6.558	10.17	11.59	6.007	4.592	5.316	9.506
511	4.824	11.42	4.441	8.075	19.21	6.882	7.265	11.17	21.04	6.858	11.05	12.08	6.639	4.834	5.481	9.986
512	4.835	11.89	4.702	8.692	20.49	6.999	7.167	11.25	22.21	7.142	11.63	12.95	6.827	4.952	5.676	10.36
513	5.187	11.96	4.771	9.152	21.44	7.179	7.793	11.74	23.18	7.668	11.77	13.48	7.099	5.44	5.758	10.56
514	5.191	12.66	4.681	9.538	22.49	7.794	7.99	12.09	23.49	7.676	12.03	13.81	7.057	5.321	5.946	11.18
515	5.666	12.79	5.058	9.846	23.03	7.677	8.47	12.54	24.37	7.953	12.35	13.94	7.444	5.491	6.128	11.18
516	5.664	13.26	5.24	9.909	23.09	7.974	8.46	12.63	25.38	8.12	12.65	14.24	7.836	5.521	6.31	11.74
517	5.54	13.72	5.057	10.13	23.6	7.894	8.81	13.2	25.47	8.459	12.94	14.72	7.63	5.803	6.549	11.86
518	5.879	13.74	5.25	10.22	23.87	8.035	8.852	13.16	26.08	8.31	13.06	15.35	7.81	5.831	6.691	12.28
519	5.851	14.02	5.16	10.22	24.67	8.32	9.116	13.64	26.13	8.19	13.32	15.4	8.083	5.866	6.593	12.57
520	5.934	14.14	5.648	10.52	24.55	8.276	9.295	13.4	26.81	8.496	13.92	15.15	7.933	6.086	6.705	12.87
521	6.101	14.26	5.624	10.78	24.31	8.795	9.013	13.55	26.75	8.487	13.23	15.86	8.2	5.867	6.761	12.33
522	5.85	14.21	5.414	10.26	24.49	8.704	9.149	14.08	26.41	8.793	13.17	15.58	8.2	6.061	6.554	13.2
523	5.785	14.36	5.627	10.68	24.53	8.411	9.124	13.78	27.15	8.524	13.61	15.38	8.498	6.001	6.791	12.65
524	5.907	14.14	5.68	10.75	24.74	8.493	9.164	13.77	26.75	8.6	13.41	15.54	8.397	5.638	6.518	12.52
525	5.877	13.92	5.415	10.68	24.95	8.402	9.386	13.79	26.91	8.039	13.02	15.87	8.317	5.949	6.651	12.42
526	5.867	14.08	5.396	10.24	24.26	8.461	9.3	13.33	26.47	8.242	13.65	15.52	8.412	6.051	6.705	12.5
527	5.68	14.01	5.419	10.46	24.06	8.17	9.054	13.14	26.38	8.102	13.57	15.44	7.808	5.779	6.653	12.4
528	5.534	13.92	5.278	9.841	24.28	8.158	9.044	12.97	25.9	8.058	13.14	15.24	7.949	5.953	6.307	12.31
529	5.546	13.3	5.243	10.2	23.74	8.016	8.965	13.29	25.48	8.19	13.08	14.83	8.291	5.867	6.564	12.37
530	5.362	13.1	4.941	9.712	23.12	8.007	8.872	13.04	25.06	7.823	12.82	15.2	8.191	5.664	6.504	11.96
531	5.451	13.49	4.959	9.536	23.2	7.888	8.548	12.87	25.15	7.726	12.55	14.65	7.762	5.414	6.337	12.32
532	5.174	13.12	4.838	9.25	22.94	7.92	8.817	12.75	24.47	7.638	12.38	14.53	7.492	5.478	6.205	11.33
533	5.143	12.57	4.842	9.675	22.01	7.604	8.483	12.36	24.8	7.608	12.15	13.39	7.78	5.645	6.083	11.15
534	5.023	12.28	4.828	9.251	22.18	7.932	8.387	12.34	23.87	7.748	11.98	13.69	6.967	5.398	5.737	10.7
535	4.841	12.37	4.631	8.906	21.35	7.159	8.016	11.69	22.65	7.39	11.82	13.19	6.924	5.174	5.706	10.81
536	5.101	11.76	4.652	9.039	21.18	7.152	8.221	11.77	23.28	7.408	11.55	13.4	6.904	4.993	5.701	10.82
537	4.856	11.16	4.68	8.238	20.13	7.196	7.681	11.35	22.31	7.072	11.44	13.18	6.608	5.281	5.102	10.42
538	4.762	11.47	4.561	8.349	20.15	6.701	7.401	11.23	21.43	6.839	11.19	12.74	6.734	4.874	5.328	10.22
539	4.803	11.18	4.299	8.246	19.32	6.696	7.652	10.52	20.81	6.906	10.7	12.32	6.463	4.999	5.355	9.96
540	4.401	11.15	4.317	7.945	19.53	6.783	7.172	10.51	20.96	6.507	10.74	12.19	6.386	4.727	5.22	9.787
541	4.47	10.7	4.087	7.671	18.72	6.552	6.888	10.2	20.22	6.439	10.23	12.19	6.406	4.541	5.246	9.092
542	4.164	9.909	4.024	7.573	18.36	6.219	6.788	10.08	19.71	5.996	9.9	11.46	6.112	4.494	5.064	9.414
543	4.097	10.22	4.03	7.208	17.6	6.32	6.532	9.857	19.01	6.055	9.646	11.7	6.129	4.199	4.806	8.735
544	3.95	10.11	3.844	7.247	17.21	5.883	6.458	9.616	18.68	5.882	9.474	11	5.698	4.194	4.617	8.685
545	3.96	9.646	3.708	7.165	17	5.907	6.342	9.425	18.37	5.465	9.221	11.15	5.682	4.118	4.473	8.658
546	4.05	9.392	3.59	6.974	16.34	5.779	6.332	9.403	17.99	5.759	8.801	10.42	5.531	4.041	4.265	8.489
547	3.802	9.035	3.653	6.877	16	5.782	5.97	8.969	17.49	5.438	8.803	10.55	5.49	3.934	4.436	8.028
548	3.931	8.89	3.487	6.676	16.07	5.244	5.833	8.801	17.13	5.693	8.7	10.19	5.233	3.986	4.188	8.272
549	3.541	8.986	3.669	6.401	15.6	5.399	5.855	8.669	16.55	5.439	8.285	9.854	5.381	3.898	4.034	7.472
550	3.519	8.841	3.463	6.318	14.97	5.288	5.512	8.351	16.25	5.424	8.082	9.265	5.167	3.751	4.195	7.497
551	3.48	8.267	3.234	6.515	15.27	5.295	5.461	8.161	15.72	5.214	8.168	9.231	5.208	3.504	4.044	7.111
552	3.368	8.235	3.224	6.034	14.01	5.007	5.71	7.971	15.08	4.975	7.799	8.751	4.886	3.271	3.941	7.079
553	3.343	8.2	3.136	5.99	13.63	4.864	5.322	7.936	15.23	4.9	7.654	8.847	4.785	3.594	3.768	7.309
554	3.112	7.705	2.959	5.826	13.77	4.779	5.245	7.536	14.94	4.604	7.36	8.317	4.302	3.429	3.837	6.799
555	3.133	7.407	2.949	5.577	13.06	4.957	5.305	7.546	14.53	4.483	7.715	8.827	4.51	3.258	3.827	6.755
556	2.776	7.384	2.923	5.391	13.21	4.571	4.804	7.404	13.85	4.335	7.213	8.39	4.314	3.275	3.451	6.713
557	2.995	7.241	2.808	5.452	13.11	4.324	4.756	7.115	13.75	4.447	7.051	8.084	4.098	3.096	3.474	6.56
558	2.719	7.214	2.84	5.376	12.38	4.471	4.737	6.795	13.24	4.213	6.996	8.228	4.102	3.204	3.414	6.293
559	2.924	7.131	2.761	4.901	12.01	4.255	4.638	6.848	12.83	4.085	6.552	7.744	4.08	3.002	3.282	6.004
560	2.846	6.872	2.318	4.842	11.87	4.154	4.642	6.544	12.72	4.038	6.333	7.542	3.825	2.91	3.309	5.779
561	2.745	6.339	2.507	4.594	11.51	3.854	4.356	6.367	12.07	4.091	6.387	7.563	3.804	2.818	2.947	6.066
562	2.442	6.489	2.338	4.648	10.91	3.849	4.39	6.628	11.89	3.874	6.27	7.383	3.942	2.654	3.148	5.731
563	2.625	6.096	2.469	4.441	10.54	3.624	3.98	6.169	11.97	4.104	6.158	6.939	3.74	2.783	2.803	5.38
564	2.597	5.974	2.322	4.441	10.22	3.737	4.153	5.974	11.37	3.59	6.073	6.833	3.305	2.548	2.748	5.493
565	2.546	5.658	2.324	4.297	10.22	3.546	4.178	6.017	10.95	3.822	5.672	6.77	3.486	2.64	2.822	5.275
566	2.534	5.711	2.406	4.314	10.05	3.38	3.945	5.888	10.63	3.569	5.71	6.579	3.53	2.551	2.817	5.268
567	2.316	5.663	2.174	4.222	9.841	3.437	3.965	5.549	10.63	3.19	5.465	6.653	3.314	2.232	2.632	4.896
568	2.361	5.396	2.105	3.801	9.269	3.339	3.958	5.532	10.26	3.318	5.131	6.097	3.091	2.348	2.632	4.809
569	2.4	5.382	2.178	3.824	9.262	3.367	3.713	5.274	9.82	3.32	5.253	5.895	3.217	2.333	2.59	4.611
570	2.11	4.851	2.125	3.679	8.59	3.006	3.469	5.128	9.77	2.998	4.78	6.003	2.921	2.18	2.584	4.618
571	2.085	4.751	2.055	3.693	8.73	3.209	3.382	4.92	9.44	2.958	4.824	5.426	3.035	2.245	2.575	4.32
572	1.93	4.726	1.926	3.616	8.499	3.351	3.402	4.624	9.218	3.046	4.481	5.852	2.871	2.065	2.399	4.469
573	2.028	5.046	1.793	3.392	8.369	3.11	3.381	4.794	9.016	3.054	4.617	5.491	2.827	1.952	2.3	4.037
574	1.813	4.703	1.704	3.279	7.922	2.828	3.061	4.364	8.659	2.803	4.543	5.387	2.672	1.941	2.103	4.023
575	1.864	4.33	1.794	3.091	7.921	2.742	3.112	4.657	8.688	2.733	4.441	5.205	2.487	2.063	2.11	3.775
576	1.881	4.283	1.742	3.056	7.45	2.862	2.812	4.421	7.928	2.709	4.152	5.048	2.598	1.945	2.184	3.915
577	1.877	4.157	1.6	3.185	7.401	2.849	3.027	4.228	7.912	2.469	3.998	4.901	2.659	1.813	2.069	3.733
578	1.562	3.989	1.684	2.953	7.266	2.491	2.722	4.112	7.527	2.538	3.774	4.7	2.524	1.783	2.104	3.584
579	1.567	3.847	1.55	2.871	6.722	2.449	2.671	3.99	7.377	2.49	3.838	4.487	2.415	1.729	1.754	3.717
580	1.604	3.796	1.456	2.669	6.596	2.534	2.542	3.756	7.149	2.337	3.62	4.294	2.309	1.739	1.937	3.559
581	1.571	3.827	1.552	2.744	6.26	2.431	2.457	3.724	7.22	2.399	3.558	4.197	2.262	1.555	1.765	3.268
582	1.475	3.357	1.517	2.544	6.306	2.371	2.333	3.813	6.99	2.351	3.438	4.061	1.994	1.464	1.737	2.97
583	1.588	3.36	1.361	2.375	6.061	2.325	2.306	3.302	6.388	2.196	3.321	4.041	2.076	1.367	1.659	3.168
584	1.325	3.362	1.469	2.348	6.145	2.113	2.368	3.233	6.631	1.96	3.265	3.843	1.961	1.486	1.666	2.974
585	1.409	3.164	1.217	2.383	5.536	1.964	2.287	3.16	6.277	2.034	2.981	3.738	1.973	1.499	1.411	2.791
586	1.288	3.232	1.04	2.411	5.581	1.917	2.204	3.222	6.11	2.048	2.923	3.749	1.942	1.326	1.459	2.77
587	1.347	2.94	1.302	2.124	5.193	1.826	2.212	3.19	5.788	1.846	2.844	3.41	1.878	1.46	1.489	2.933
588	1.244	3.005	1.245	2.207	5.315	1.752	2.143	3.003	5.613	1.794	2.879	3.515	1.754	1.328	1.402	2.581
589	1.14	2.724	1.232	1.942	5.04	1.647	1.934	2.919	5.291	1.887	2.72	3.36	1.829	1.161	1.439	2.51
590	1.224	2.754	1.115	2.107	4.824	1.644	1.814	2.778	5.109	1.771	2.758	3.287	1.704	1.175	1.357	2.342
591	1.13	2.63	0.9754	1.928	4.616	1.61	1.957	2.778	5.238	1.687	2.665	3.074	1.649	1.143	1.321	2.479
592	1.093	2.521	1.084	1.9	4.736	1.692	1.783	2.703	4.868	1.499	2.703	3.363	1.455	1.099	1.419	2.256
593	1.09	2.417	1.09	1.991	4.204	1.699	1.759	2.523	4.79	1.563	2.44	3.071	1.431	1.066	1.194	2.129
594	1.172	2.356	0.9941	1.788	4.079	1.498	1.699	2.384	4.398	1.424	2.419	2.93	1.369	0.9843	1.25	2.22
595	1.056	2.487	0.8755	1.715	4.106	1.433	1.625	2.474	4.52	1.391	2.258	2.727	1.455	0.9751	1.172	2.086
596	0.8394	2.305	0.9809	1.611	3.922	1.559	1.536	2.338	4.367	1.474	2.16	2.473	1.372	1.019	1.244	2.101
597	0.9643	2.242	0.8204	1.552	4.048	1.462	1.728	2.346	4.278	1.553	2.274	2.519	1.304	0.9859	1.111	2.076
598	0.837	2.172	0.9634	1.726	3.838	1.36	1.533	2.165	4.22	1.464	2.017	2.694	1.249	0.9473	1.073	2.175
599	1.008	2.17	0.8304	1.445	3.648	1.224	1.561	2.187	3.921	1.199	1.93	2.321	1.247	0.9164	0.9974	1.734
600	0.8883	1.759	0.7802	1.496	3.696	1.4	1.442	2.026	3.752	1.275	2.087	2.293	1.12	0.935	0.9004	1.919
Auto Load Range A1 - Q123

## Sheet: Result Summary
Result Overview
No Summary

## Sheet: Basic Information
Basic Information
	Software Version			SkanIt Software 6.1 RE for Microplate Readers RE, ver. 6.1.0.51

## Sheet: Program Information
Program Information
	Program Name			New Program.skax
	Session Comments
	Software Version			SkanIt Software RE for Microplate Readers RE, ver. 6.1.0.51
	Execution Time			2022/3/21 20:48:39
	User			DESKTOP-BK9BVR7\JYK

## Sheet: Instrument Information
Instrument Information
	Name			Varioskan LUX
	ESW Version			1.00.38
	Optical Response Compensation			yes
	Serial Number			3020-81063
	Instrument Module/Component
	Filter
		Name of Optical Component		New filter
		Position of Optical Component		1
		Wavelength		620
		Bandwidth		10
		Definition Date and Time		2021/9/8 16:05:00
	Filter
		Name of Optical Component		New filter
		Position of Optical Component		2
		Wavelength		655
		Bandwidth		10
		Definition Date and Time		2021/9/8 16:05:00
		Module Name		LAT Module
		Module Serial Number		LL2106802
		Module Name		TRF Module
		Module Serial Number		LT210602
		Adapter Name for Plate		96-well adapter for plate without lid
		Adapter Number for Plate		2
		Incubator		yes
		Gas Control		no
		Top Optical Component		yes
		Bottom Optical Component		yes
		Pipette / Liquid Handler		yes

## Sheet: Program Settings
Program Settings
	Measurement Sequence			3
	Start-up Stabilization Delay			yes
	Temperature Check at Start [°C]			no
Fluorescence Spectrum 1
	Type			Emission Spectrum
	Wavelength Range
		Start [nm]		490
		End [nm]		600
		Step [nm]		1
	Fitting Wavelength			450
	Light Path			Top Read
	Excitation Bandwidth [nm]			5
	Dynamic Range			Automatic
	Measurement Time [ms]			100

## Sheet: Run Log
Run Log
	Time	Event	Message
	2022/3/21 20:48:40	Program New Program.skax Started
	2022/3/21 20:48:40	Temperature	21.4°C
	2022/3/21 20:48:40	Step Fluorescence Spectrum 1 Started
	2022/3/21 20:48:45	Calibration	1.03843 21802
	2022/3/21 20:48:51	Temperature	21.4°C
	2022/3/21 20:49:51	Temperature	21.4°C
	2022/3/21 20:50:51	Temperature	21.3°C
	2022/3/21 20:51:51	Temperature	21.4°C
	2022/3/21 20:52:48	Step Fluorescence Spectrum 1 Ended
	2022/3/21 20:52:48	Temperature	21.4°C
	2022/3/21 20:52:51	Temperature	21.4°C
	2022/3/21 20:52:58	Program New Program.skax Ended

## Sheet: Plate and Sample
Name	Plate 1
Plate Template	ANSI/SBS Standard, 96-well
	1	2	3	4	5	6	7	8	9	10	11	12
A
B
C
D	Blank1	Blank1	Blank1	Blank1	Blank1	Blank1	Blank1	Blank1	Blank1
	Group 1	Group 1	Group 1	Group 1	Group 1	Group 1	Group 1	Group 1	Group 1
E	Blank1	Blank1	Blank1	Blank1	Blank1	Blank1	Blank1
	Group 1	Group 1	Group 1	Group 1	Group 1	Group 1	Group 1
F
G
H
