# Supplementary material for: SplintR ligation-triggered in-situ rolling circle amplification on magnetic bead for accurate detection of circulating microRNAs
Source: PeerJ. 2025 Mar 11;13:e19082. doi: 10.7717/peerj.19082 (PMC11908441; doi:10.7717/peerj.19082)
Supplement: Supplemental Information 43 [file peerj-13-19082-s043.xlsx]

## Sheet: Fluorescence Spectrum
Detection Results
New Program.skax
2022/3/16 21:06:54
Fluorescence Spectrum 1
Em 470-600 nm，Ex 450 nm
Plate 1
	0.5	1	1.5	2	4	Blank	0.5	1	1.5	2	4	0.5	1	1.5	2	4
Wavelength	Blank1 (A01)	Blank1 (A02)	Blank1 (A03)	Blank1 (A04)	Blank1 (A05)	Blank1 (A06)	Blank1 (B01)	Blank1 (B02)	Blank1 (B03)	Blank1 (B04)	Blank1 (B05)	Blank1 (C01)	Blank1 (C02)	Blank1 (C03)	Blank1 (C04)	Blank1 (C05)
470	0.7218	0.5471	0.496	0.5574	0.8057	0.4323	0.8253	0.6242	0.4579	0.4034	0.9628	0.9234	0.3664	0.4033	0.3204	0.4543
471	0.5024	0.4174	0.4481	0.378	0.5124	0.3907	0.4693	0.6185	0.4934	0.2914	0.5039	0.4506	0.3002	0.3604	0.2917	0.4801
472	0.4491	0.4541	0.3917	0.3754	0.3984	0.3315	0.4357	0.4545	0.4067	0.4107	0.353	0.4033	0.2494	0.362	0.3152	0.4402
473	0.4546	0.4887	0.3234	0.4114	0.4496	0.3617	0.3928	0.4457	0.3947	0.3534	0.4633	0.3773	0.3425	0.3202	0.3403	0.4116
474	0.3956	0.4608	0.3798	0.4157	0.3704	0.3264	0.4529	0.4598	0.3788	0.3753	0.4138	0.4113	0.3992	0.3576	0.3863	0.3875
475	0.4267	0.4675	0.3734	0.3721	0.4949	0.3936	0.3642	0.3945	0.3758	0.4093	0.4273	0.4299	0.3072	0.3525	0.3675	0.3266
476	0.462	0.4162	0.4554	0.4261	0.3931	0.3802	0.3083	0.4527	0.3684	0.4465	0.4226	0.3655	0.3907	0.3903	0.4295	0.341
477	0.4917	0.4055	0.3409	0.4225	0.4586	0.4197	0.4017	0.4882	0.4121	0.3492	0.3649	0.4324	0.2682	0.3328	0.3622	0.4008
478	0.4183	0.5197	0.4165	0.496	0.4281	0.4142	0.4375	0.4461	0.4209	0.3331	0.5112	0.4325	0.4141	0.3483	0.3553	0.3505
479	0.3987	0.4797	0.3769	0.3932	0.5304	0.4014	0.4424	0.4447	0.4723	0.4046	0.4319	0.4524	0.3519	0.432	0.3668	0.4436
480	0.4344	0.4452	0.4301	0.4598	0.4802	0.3735	0.5123	0.4958	0.3978	0.3959	0.4255	0.3841	0.4966	0.3926	0.3909	0.4259
481	0.4801	0.3427	0.393	0.3665	0.4288	0.4541	0.451	0.4169	0.4372	0.4221	0.5184	0.4337	0.4046	0.3562	0.4192	0.3701
482	0.536	0.4442	0.3722	0.4116	0.48	0.3493	0.4305	0.5784	0.4591	0.4296	0.4889	0.4386	0.3707	0.4042	0.4361	0.4572
483	0.4858	0.4328	0.4251	0.4561	0.3913	0.4695	0.4039	0.437	0.4668	0.4273	0.3777	0.4496	0.3597	0.3992	0.3766	0.4313
484	0.4568	0.4553	0.3875	0.4873	0.4801	0.426	0.4459	0.5472	0.455	0.3814	0.4478	0.4334	0.5091	0.3572	0.3999	0.4498
485	0.4026	0.4148	0.5267	0.5806	0.4699	0.5455	0.5035	0.4859	0.4624	0.3854	0.4431	0.4778	0.458	0.3458	0.4196	0.4346
486	0.4576	0.4477	0.5039	0.4386	0.4088	0.4617	0.5322	0.4325	0.4666	0.4682	0.527	0.4342	0.3855	0.4608	0.4073	0.4344
487	0.4793	0.4794	0.4899	0.5237	0.4495	0.5389	0.4736	0.4334	0.4213	0.4094	0.5085	0.4798	0.4679	0.3638	0.4444	0.5064
488	0.4897	0.4397	0.4204	0.3976	0.4715	0.4847	0.4608	0.4513	0.4987	0.5335	0.4584	0.4443	0.4486	0.4505	0.4083	0.4337
489	0.5	0.4005	0.4323	0.5128	0.4615	0.4581	0.5122	0.4994	0.4602	0.4994	0.4441	0.5353	0.3881	0.4801	0.4767	0.5784
490	0.5404	0.4646	0.4381	0.4811	0.5162	0.5006	0.4677	0.4192	0.5449	0.4707	0.4418	0.4315	0.4753	0.451	0.4258	0.363
491	0.5181	0.4778	0.4274	0.4553	0.3959	0.4864	0.4646	0.3751	0.4463	0.4269	0.503	0.4602	0.4536	0.457	0.4199	0.454
492	0.444	0.5255	0.4688	0.5459	0.482	0.5108	0.4526	0.5275	0.4146	0.461	0.4473	0.4753	0.4861	0.5061	0.4435	0.4954
493	0.4705	0.4816	0.4713	0.4729	0.4752	0.4751	0.5017	0.5055	0.467	0.4183	0.5315	0.4647	0.4064	0.4468	0.5051	0.4673
494	0.4654	0.5214	0.4589	0.4967	0.4483	0.4448	0.441	0.4755	0.448	0.4454	0.5613	0.4101	0.4615	0.4749	0.4921	0.4878
495	0.4488	0.5556	0.4595	0.524	0.4983	0.4438	0.442	0.4468	0.4457	0.498	0.5223	0.4238	0.5442	0.5022	0.4727	0.4601
496	0.4659	0.4411	0.4541	0.4726	0.4848	0.4868	0.4807	0.4274	0.4968	0.5026	0.4664	0.4352	0.451	0.4941	0.4625	0.5194
497	0.5307	0.4218	0.4364	0.4915	0.4152	0.4234	0.409	0.4519	0.5252	0.4268	0.437	0.5114	0.3653	0.428	0.5198	0.5102
498	0.5773	0.4974	0.4737	0.4931	0.4892	0.4102	0.4516	0.4478	0.4639	0.3915	0.4826	0.5096	0.4328	0.4623	0.4205	0.4104
499	0.4767	0.5075	0.4109	0.4092	0.4007	0.4452	0.4761	0.5148	0.5142	0.4895	0.482	0.4377	0.4736	0.3641	0.4276	0.3884
500	0.4014	0.402	0.4968	0.4371	0.4913	0.4727	0.4798	0.4856	0.4967	0.4064	0.4224	0.5514	0.5003	0.4388	0.473	0.4143
501	0.4781	0.406	0.5461	0.554	0.4603	0.4801	0.5071	0.5145	0.4353	0.4923	0.5507	0.4594	0.4579	0.4106	0.4123	0.3506
502	0.4879	0.4371	0.4773	0.4486	0.4216	0.4655	0.4316	0.424	0.4767	0.4276	0.3981	0.3714	0.4072	0.4625	0.4749	0.4547
503	0.4057	0.4177	0.5046	0.4359	0.467	0.4153	0.4016	0.4314	0.4533	0.437	0.441	0.3937	0.4447	0.3751	0.4781	0.4818
504	0.4825	0.4842	0.3835	0.5376	0.5207	0.4553	0.4405	0.5193	0.4372	0.4217	0.4001	0.4178	0.357	0.4694	0.3714	0.5202
505	0.5373	0.4372	0.466	0.415	0.4047	0.4851	0.4152	0.4677	0.4755	0.4921	0.3951	0.4099	0.3904	0.436	0.4291	0.4716
506	0.4764	0.3749	0.4237	0.4962	0.3793	0.4594	0.4619	0.4242	0.4186	0.5442	0.437	0.3943	0.446	0.4635	0.3952	0.4375
507	0.4446	0.4392	0.4609	0.4458	0.4399	0.39	0.4525	0.434	0.4877	0.4651	0.4485	0.4529	0.3767	0.3818	0.4349	0.4563
508	0.4494	0.4635	0.4081	0.4456	0.4003	0.4702	0.5214	0.3763	0.3711	0.4866	0.434	0.3492	0.3769	0.4707	0.3932	0.4306
509	0.4449	0.4049	0.3858	0.3956	0.4639	0.4412	0.4373	0.3894	0.4027	0.3924	0.4298	0.3744	0.3945	0.4461	0.3707	0.4456
510	0.4634	0.4801	0.4018	0.4126	0.4235	0.3857	0.4149	0.4531	0.4404	0.4062	0.4347	0.3973	0.4365	0.3394	0.4352	0.3902
511	0.4183	0.4571	0.4701	0.408	0.3869	0.4115	0.3812	0.435	0.4456	0.4765	0.3958	0.3725	0.4706	0.411	0.4085	0.402
512	0.3818	0.343	0.4328	0.4151	0.4289	0.4358	0.4083	0.4522	0.4611	0.4347	0.4624	0.4348	0.3823	0.3506	0.4458	0.4008
513	0.4314	0.3553	0.401	0.3815	0.3617	0.4291	0.4061	0.4725	0.426	0.4155	0.4529	0.3632	0.4167	0.3546	0.4467	0.3741
514	0.4464	0.4341	0.3666	0.381	0.5053	0.3082	0.3813	0.4186	0.4136	0.4013	0.3749	0.3563	0.4463	0.3717	0.3731	0.4122
515	0.4159	0.4053	0.4638	0.4358	0.434	0.3879	0.3671	0.4484	0.4389	0.4023	0.4767	0.3887	0.4305	0.4083	0.4158	0.4362
516	0.3637	0.4284	0.4092	0.4752	0.4062	0.4697	0.4424	0.4296	0.4928	0.4726	0.4801	0.417	0.4089	0.4233	0.3611	0.4705
517	0.3696	0.4371	0.382	0.3534	0.3519	0.4562	0.4815	0.3947	0.36	0.4131	0.4032	0.3826	0.4175	0.3531	0.437	0.4249
518	0.4183	0.3905	0.4108	0.4102	0.3741	0.3835	0.3988	0.4179	0.3724	0.4176	0.4422	0.3307	0.362	0.4064	0.3725	0.4015
519	0.4248	0.5155	0.4386	0.3917	0.4254	0.4023	0.4107	0.4147	0.3792	0.3633	0.4149	0.3311	0.3605	0.3989	0.3778	0.3586
520	0.3689	0.4405	0.4152	0.3626	0.3716	0.3915	0.4613	0.3928	0.4026	0.41	0.4621	0.3811	0.3606	0.4221	0.3799	0.344
521	0.4002	0.4207	0.3762	0.4011	0.3855	0.3317	0.4457	0.4224	0.4046	0.3515	0.3795	0.4331	0.3769	0.3589	0.3788	0.4067
522	0.419	0.4373	0.3801	0.4565	0.3552	0.3993	0.3841	0.3708	0.3841	0.3907	0.353	0.4233	0.4059	0.3925	0.3924	0.3477
523	0.341	0.4058	0.389	0.4141	0.3358	0.3409	0.3983	0.4402	0.4601	0.3732	0.3509	0.357	0.3988	0.3827	0.3584	0.4255
524	0.4439	0.406	0.3488	0.3832	0.4013	0.4213	0.4589	0.3532	0.4686	0.3353	0.467	0.3724	0.3529	0.4286	0.4022	0.3522
525	0.4145	0.3843	0.4528	0.3325	0.4378	0.3617	0.4312	0.4378	0.409	0.3958	0.3993	0.4251	0.4322	0.3522	0.4218	0.3474
526	0.4303	0.3598	0.3993	0.4012	0.4052	0.4236	0.4162	0.3884	0.3608	0.3383	0.3819	0.3296	0.335	0.3861	0.3749	0.3699
527	0.4483	0.4024	0.3934	0.4141	0.4398	0.3677	0.3645	0.3899	0.3148	0.3637	0.4122	0.3336	0.4307	0.377	0.3824	0.4371
528	0.3667	0.4193	0.3623	0.4307	0.3941	0.3703	0.3489	0.3407	0.408	0.3578	0.4385	0.3164	0.3291	0.4175	0.3503	0.3438
529	0.4268	0.3763	0.3782	0.3787	0.3743	0.3696	0.3921	0.3525	0.3467	0.4197	0.4604	0.4119	0.4265	0.3726	0.3517	0.3674
530	0.412	0.3681	0.388	0.3442	0.3878	0.3286	0.4017	0.4204	0.3864	0.3517	0.4347	0.3202	0.41	0.3388	0.3097	0.3778
531	0.3945	0.3903	0.3303	0.4796	0.4121	0.348	0.3507	0.3103	0.3346	0.3355	0.4155	0.3666	0.4109	0.2938	0.3685	0.3298
532	0.3378	0.327	0.306	0.3805	0.3863	0.3711	0.3643	0.3295	0.3664	0.4039	0.3574	0.3267	0.3301	0.3645	0.3789	0.3415
533	0.3532	0.3892	0.3354	0.3234	0.3602	0.376	0.3229	0.4598	0.3794	0.3407	0.3698	0.3082	0.3265	0.3566	0.3706	0.3162
534	0.3826	0.3369	0.371	0.3394	0.2994	0.3581	0.2801	0.4021	0.3358	0.3855	0.2875	0.3397	0.3832	0.3797	0.3209	0.342
535	0.3964	0.3797	0.2822	0.3482	0.3755	0.3619	0.3375	0.2956	0.3061	0.4025	0.3695	0.3138	0.3704	0.3385	0.3298	0.2781
536	0.2869	0.3787	0.3158	0.319	0.3403	0.3145	0.3934	0.351	0.3486	0.3175	0.3475	0.413	0.3951	0.3222	0.2677	0.357
537	0.3557	0.3727	0.3619	0.3569	0.3471	0.3149	0.4274	0.3397	0.3687	0.2716	0.3673	0.328	0.4074	0.3596	0.319	0.3132
538	0.3364	0.3806	0.3513	0.3217	0.3409	0.3694	0.2854	0.3273	0.4065	0.3547	0.3011	0.3195	0.3824	0.307	0.3977	0.3575
539	0.3969	0.3717	0.3918	0.3506	0.3406	0.3571	0.3017	0.2971	0.4	0.321	0.2918	0.3127	0.3884	0.3822	0.3441	0.2563
540	0.3694	0.361	0.3581	0.2966	0.3649	0.3183	0.3457	0.3281	0.3523	0.2844	0.3404	0.3103	0.4312	0.2736	0.245	0.3178
541	0.3065	0.3071	0.3538	0.2934	0.2922	0.2832	0.315	0.3032	0.3703	0.3417	0.3185	0.3073	0.339	0.3001	0.324	0.3227
542	0.3509	0.3901	0.3046	0.2941	0.3106	0.3217	0.3131	0.288	0.3531	0.2368	0.2932	0.301	0.4037	0.238	0.2804	0.3078
543	0.3376	0.3132	0.3452	0.2687	0.2988	0.3435	0.3336	0.3202	0.3194	0.2638	0.3039	0.3195	0.5224	0.236	0.2828	0.3322
544	0.3705	0.2752	0.2761	0.2914	0.3741	0.3064	0.2258	0.3624	0.2848	0.3377	0.2683	0.386	0.4864	0.2756	0.2722	0.3621
545	0.3224	0.3127	0.2675	0.3094	0.2804	0.3132	0.2687	0.2492	0.2793	0.3241	0.2768	0.353	0.4973	0.2377	0.2691	0.2251
546	0.286	0.2823	0.3114	0.3002	0.3493	0.377	0.2688	0.259	0.2903	0.3384	0.3233	0.2936	0.5466	0.3532	0.2448	0.2561
547	0.2971	0.2964	0.2738	0.2846	0.2962	0.2749	0.3427	0.2603	0.286	0.2684	0.3076	0.2874	0.6258	0.2598	0.252	0.2585
548	0.3189	0.366	0.2343	0.292	0.2767	0.3504	0.2899	0.3156	0.3333	0.2009	0.3025	0.2297	0.7067	0.2582	0.3148	0.2499
549	0.3305	0.2786	0.2839	0.3137	0.2777	0.2797	0.2872	0.2738	0.287	0.2546	0.3114	0.3071	0.7394	0.3141	0.2581	0.3208
550	0.3569	0.2472	0.2378	0.2845	0.2662	0.3045	0.2297	0.266	0.329	0.2855	0.2664	0.2406	0.8077	0.2552	0.2565	0.2456
551	0.2657	0.294	0.2762	0.3269	0.2756	0.3589	0.2728	0.3173	0.2622	0.3	0.2702	0.2482	0.9228	0.2208	0.2469	0.2706
552	0.3236	0.267	0.2373	0.3147	0.206	0.3588	0.2916	0.2941	0.2984	0.3173	0.2668	0.1801	1.007	0.2597	0.2473	0.2477
553	0.2307	0.2902	0.2568	0.2792	0.2437	0.3364	0.2492	0.2868	0.2777	0.2402	0.3094	0.2828	1.088	0.2626	0.2489	0.2392
554	0.3254	0.2916	0.2666	0.2611	0.28	0.264	0.2284	0.2834	0.2271	0.2309	0.2221	0.2395	1.165	0.3279	0.216	0.2194
555	0.2549	0.2986	0.2598	0.2381	0.2303	0.344	0.2533	0.2865	0.2654	0.2219	0.2799	0.1881	1.28	0.2798	0.2537	0.244
556	0.295	0.2391	0.1734	0.2483	0.2606	0.404	0.2463	0.2212	0.3588	0.2233	0.264	0.2468	1.297	0.2451	0.2114	0.2525
557	0.2188	0.2485	0.2097	0.2708	0.2527	0.4119	0.2386	0.3308	0.2448	0.2027	0.2354	0.2435	1.72	0.2036	0.2464	0.1905
558	0.243	0.2425	0.2055	0.2526	0.2524	0.3585	0.2371	0.2482	0.2548	0.274	0.2581	0.2562	1.644	0.2353	0.2494	0.2511
559	0.2947	0.2292	0.253	0.2631	0.1927	0.3606	0.2112	0.3009	0.2453	0.2345	0.2124	0.2476	1.956	0.2229	0.2815	0.2024
560	0.2216	0.2481	0.2588	0.2599	0.2767	0.28	0.2358	0.2192	0.249	0.2515	0.229	0.2924	1.942	0.2444	0.2093	0.2116
561	0.2466	0.2015	0.2156	0.2224	0.2337	0.3295	0.1978	0.2049	0.2591	0.1989	0.2407	0.2997	1.984	0.2356	0.1769	0.2339
562	0.2112	0.1764	0.2815	0.2196	0.2596	0.3949	0.2815	0.2549	0.3016	0.2029	0.2471	0.2261	2.275	0.2198	0.2362	0.2449
563	0.234	0.2321	0.2198	0.2257	0.2096	0.3037	0.232	0.192	0.2835	0.2354	0.251	0.2215	2.243	0.2787	0.2316	0.2053
564	0.305	0.1841	0.228	0.2529	0.2336	0.3984	0.2577	0.1992	0.3387	0.2411	0.2118	0.177	2.332	0.2143	0.2465	0.2137
565	0.1908	0.2431	0.2409	0.2474	0.2374	0.4048	0.1723	0.2295	0.2461	0.2402	0.225	0.1677	2.448	0.2078	0.2004	0.2292
566	0.1837	0.2134	0.2192	0.2402	0.2306	0.3824	0.2046	0.2532	0.3322	0.2368	0.2203	0.2226	2.383	0.2688	0.1967	0.2389
567	0.2371	0.2046	0.2597	0.2438	0.2588	0.3902	0.2486	0.2216	0.2571	0.2254	0.2163	0.2113	2.446	0.2056	0.1954	0.1962
568	0.2095	0.2892	0.2099	0.2383	0.2553	0.3562	0.2023	0.2331	0.2355	0.2116	0.146	0.2696	2.648	0.2078	0.187	0.177
569	0.253	0.2192	0.2445	0.1911	0.1952	0.3535	0.2248	0.1961	0.2438	0.1967	0.2401	0.2451	2.782	0.2211	0.1956	0.2352
570	0.1816	0.1502	0.153	0.1951	0.2413	0.3823	0.2541	0.1848	0.2898	0.1926	0.1839	0.2459	2.674	0.1926	0.1957	0.2331
571	0.1642	0.1353	0.2065	0.1702	0.2731	0.3173	0.1503	0.224	0.2264	0.217	0.1233	0.195	2.708	0.1948	0.173	0.2155
572	0.1692	0.1956	0.1939	0.2107	0.1767	0.4103	0.1836	0.2326	0.2405	0.1596	0.1561	0.1883	2.867	0.1933	0.172	0.2018
573	0.1845	0.2058	0.1887	0.1809	0.1787	0.2994	0.1335	0.2021	0.2331	0.2077	0.1941	0.2014	2.495	0.1721	0.1863	0.1809
574	0.2037	0.2261	0.1932	0.1963	0.2097	0.4437	0.1706	0.198	0.1972	0.2156	0.2097	0.1772	2.527	0.1377	0.1964	0.1274
575	0.1695	0.1504	0.2133	0.1976	0.1647	0.3331	0.2165	0.1596	0.2425	0.1937	0.2203	0.2315	2.518	0.1903	0.1709	0.2074
576	0.2118	0.1574	0.1404	0.1667	0.174	0.3526	0.1777	0.1468	0.187	0.14	0.2338	0.173	2.343	0.1966	0.1723	0.1687
577	0.1939	0.1405	0.1473	0.2096	0.1382	0.3686	0.1494	0.2076	0.2248	0.164	0.167	0.1863	2.424	0.1054	0.1651	0.1439
578	0.1355	0.1743	0.1793	0.2002	0.1337	0.3282	0.1992	0.2138	0.2683	0.1776	0.1132	0.1899	2.353	0.2106	0.1551	0.1666
579	0.1877	0.2096	0.1852	0.1844	0.1337	0.3809	0.1085	0.1993	0.1976	0.1511	0.1296	0.1662	2.337	0.1112	0.1617	0.1922
580	0.1516	0.1335	0.1619	0.1807	0.1455	0.3371	0.176	0.1676	0.174	0.1573	0.1196	0.1782	2.213	0.1511	0.1997	0.1368
581	0.1783	0.2121	0.1275	0.1971	0.1292	0.2839	0.1699	0.1594	0.1782	0.1047	0.2177	0.153	2.073	0.1342	0.1438	0.1779
582	0.1618	0.1688	0.1501	0.1305	0.1377	0.298	0.1295	0.1837	0.2238	0.1759	0.1466	0.151	1.984	0.1597	0.1588	0.1433
583	0.1841	0.1633	0.1608	0.1909	0.1483	0.2482	0.1606	0.1956	0.1963	0.1657	0.206	0.208	2.056	0.1676	0.1877	0.1473
584	0.1467	0.1338	0.131	0.1388	0.1106	0.2284	0.1826	0.1321	0.1302	0.1667	0.1753	0.1331	1.799	0.1552	0.147	0.1567
585	0.1462	0.1334	0.1076	0.2283	0.1471	0.2417	0.156	0.1846	0.1495	0.1485	0.1481	0.1858	1.703	0.1347	0.1101	0.1375
586	0.1458	0.1721	0.1032	0.1455	0.1491	0.2771	0.1851	0.1122	0.1124	0.1326	0.1556	0.1347	1.787	0.1521	0.1241	0.1407
587	0.1248	0.1175	0.1306	0.1575	0.1121	0.3445	0.1401	0.1432	0.1439	0.2055	0.1063	0.1461	1.418	0.1797	0.1401	0.1345
588	0.1276	0.09785	0.07747	0.1599	0.1302	0.2964	0.1095	0.1614	0.1281	0.1354	0.1397	0.1146	1.495	0.1355	0.1318	0.1672
589	0.139	0.1425	0.1619	0.1951	0.1381	0.1968	0.1608	0.1366	0.1721	0.0917	0.07771	0.1714	1.444	0.1045	0.1099	0.1494
590	0.1475	0.1467	0.09036	0.2066	0.1215	0.2649	0.08247	0.1661	0.1606	0.09906	0.1375	0.1336	1.443	0.121	0.1274	0.1137
591	0.1571	0.1489	0.09952	0.1422	0.09521	0.1991	0.104	0.08917	0.1368	0.1113	0.1022	0.09783	1.273	0.08773	0.1279	0.122
592	0.09321	0.1313	0.09571	0.09455	0.09488	0.1702	0.08202	0.108	0.1057	0.1172	0.08478	0.1254	1.253	0.1236	0.1133	0.1491
593	0.1316	0.09776	0.09674	0.1118	0.08919	0.1876	0.1312	0.1387	0.1302	0.13	0.1004	0.1986	1.22	0.1528	0.1009	0.1086
594	0.0933	0.09552	0.1397	0.1194	0.1308	0.1808	0.1236	0.1595	0.1315	0.1323	0.1401	0.09698	1.121	0.1525	0.1045	0.1266
595	0.157	0.1221	0.1252	0.1398	0.1237	0.2319	0.1177	0.1098	0.136	0.1496	0.1536	0.1678	1.001	0.09925	0.1246	0.09565
596	0.1063	0.07615	0.07685	0.1189	0.1219	0.1724	0.1004	0.09728	0.1519	0.1015	0.09421	0.1281	1.023	0.1553	0.1075	0.07782
597	0.1103	0.09563	0.118	0.1274	0.09014	0.1158	0.1582	0.1351	0.1355	0.09249	0.1332	0.1297	0.9548	0.1066	0.1242	0.1348
598	0.1348	0.1106	0.08108	0.1239	0.154	0.168	0.1226	0.1163	0.1207	0.1208	0.1082	0.1102	0.9366	0.08328	0.07061	0.06714
599	0.1289	0.1113	0.119	0.1109	0.09101	0.1469	0.08932	0.07761	0.1122	0.08379	0.1307	0.1266	0.914	0.1208	0.08569	0.06603
600	0.1259	0.09361	0.09608	0.1131	0.09837	0.1714	0.1126	0.1526	0.1062	0.09411	0.0982	0.09341	0.8884	0.08772	0.0999	0.1368
	0.7218	0.5556	0.5461	0.5806	0.8057	0.5455	0.8253	0.6242	0.5449	0.5442	0.9628	0.9234	2.867	0.5061	0.5198	0.5784
Auto Load Range A1 - Q143

## Sheet: Result Summary
Result Overview
No Summary

## Sheet: Basic Information
Basic Information
	Software Version			SkanIt Software 6.1 RE for Microplate Readers RE, ver. 6.1.0.51

## Sheet: Program Information
Program Information
	Program Name			New Program.skax
	Session Comments
	Software Version			SkanIt Software RE for Microplate Readers RE, ver. 6.1.0.51
	Execution Time			2022/3/16 21:06:54
	User			DESKTOP-BK9BVR7\JYK

## Sheet: Instrument Information
Instrument Information
	Name			Varioskan LUX
	ESW Version			1.00.38
	Optical Response Compensation			yes
	Serial Number			3020-81063
	Instrument Module/Component
	Filter
		Name of Optical Component		New filter
		Position of Optical Component		1
		Wavelength		620
		Bandwidth		10
		Definition Date and Time		2021/9/8 16:05:00
	Filter
		Name of Optical Component		New filter
		Position of Optical Component		2
		Wavelength		655
		Bandwidth		10
		Definition Date and Time		2021/9/8 16:05:00
		Module Name		LAT Module
		Module Serial Number		LL2106802
		Module Name		TRF Module
		Module Serial Number		LT210602
		Adapter Name for Plate		96-well adapter for plate without lid
		Adapter Number for Plate		2
		Incubator		yes
		Gas Control		no
		Top Optical Component		yes
		Bottom Optical Component		yes
		Pipette / Liquid Handler		yes

## Sheet: Program Settings
Program Settings
	Measurement Sequence			3
	Start-up Stabilization Delay			yes
	Temperature Check at Start [°C]			no
Fluorescence Spectrum 1
	Type			Emission Spectrum
	Wavelength Range
		Start [nm]		470
		End [nm]		600
		Step [nm]		1
	Fitting Wavelength			450
	Light Path			Top Read
	Excitation Bandwidth [nm]			5
	Dynamic Range			Automatic
	Measurement Time [ms]			100

## Sheet: Run Log
Run Log
	Time	Event	Message
	2022/3/16 21:06:54	Program New Program.skax Started
	2022/3/16 21:06:54	Temperature	22.3°C
	2022/3/16 21:06:54	Step Fluorescence Spectrum 1 Started
	2022/3/16 21:06:59	Calibration	1.03912 17850
	2022/3/16 21:07:10	Temperature	22.4°C
	2022/3/16 21:08:10	Temperature	22.3°C
	2022/3/16 21:09:10	Temperature	22.3°C
	2022/3/16 21:10:10	Temperature	22.3°C
	2022/3/16 21:11:10	Temperature	22.3°C
	2022/3/16 21:11:45	Step Fluorescence Spectrum 1 Ended
	2022/3/16 21:11:45	Temperature	22.3°C
	2022/3/16 21:11:55	Program New Program.skax Ended

## Sheet: Plate and Sample
Name	Plate 1
Plate Template	ANSI/SBS Standard, 96-well
	1	2	3	4	5	6	7	8	9	10	11	12
A	Blank1	Blank1	Blank1	Blank1	Blank1	Blank1
	Group 1	Group 1	Group 1	Group 1	Group 1	Group 1
B	Blank1	Blank1	Blank1	Blank1	Blank1
	Group 1	Group 1	Group 1	Group 1	Group 1
C	Blank1	Blank1	Blank1	Blank1	Blank1
	Group 1	Group 1	Group 1	Group 1	Group 1
D
E
F
G
H
