# Supplementary material for: SplintR ligation-triggered in-situ rolling circle amplification on magnetic bead for accurate detection of circulating microRNAs
Source: PeerJ. 2025 Mar 11;13:e19082. doi: 10.7717/peerj.19082 (PMC11908441; doi:10.7717/peerj.19082)
Supplement: Supplemental Information 44 [file peerj-13-19082-s044.xlsx]

## Sheet: Fluorescence Spectrum
Detection Results
New Program.skax
2022/3/17 19:49:44
Fluorescence Spectrum 1
Ex 500-560 nm，Em 488 nm
Plate 1
Wavelength	splintR 1h	splintR 0.5h	splintR 3h
500	420	3230	361.9
501	212.2	662.4	187.3
502	77.63	116.6	70.76
503	31.39	45.8	30.16
504	11.74	16.88	11.39
505	3.644	5.735	3.284
506	0.638	1.188	0.5441
507	0.296	0.4054	0.1941
508	0.1909	0.2746	0.173
509	0.2185	0.1067	0.2213
510	0.2273	0.2132	0.1483
511	0.2109	0.1616	0.1088
512	0.1784	0.08279	0.1306
513	0.1095	0.1973	0.06004
514	0.1425	0.1183	0.0841
515	0.1464	0.04681	0.1313
516	0.06677	0.1523	0.1025
517	0.1596	0.06674	0.1708
518	0.09472	0.1111	0.06324
519	0.06614	0.1472	0.09396
520	0.07094	0.1021	0.1423
521	0.07396	0.1063	0.1136
522	0.1121	0.06789	0.1168
523	0.1404	0.09756	0.0668
524	0.05998	0.08933	0.07669
525	0.07914	0.054	0.04994
526	0.04126	0.03322	0.06542
527	0.06429	0.1021	0.07502
528	0.04785	0.07725	0.04381
529	0.1209	0.1276	0.06881
530	0.1012	0.06645	0.07859
531	0.06877	0.03836	0.03922
532	0.1007	0.04255	0.04322
533	0.03865	0.04465	0.05215
534	0.08279	0.07486	0.07389
535	0.08536	0.09161	0.09156
536	0.05871	0.1015	0.08743
537	0.06866	0.0878	0.1314
538	0.08039	0.067	0.07594
539	0.04433	0.05861	0.06317
540	0.07728	0.1032	0.05979
541	0.08237	0.05457	0.04084
542	0.03109	0.1571	0.01036
543	0.06904	0.08908	0.03474
544	0.07604	0.06304	0.02932
545	0.05163	0.0754	0.08232
546	0.04724	0.0598	0.02008
547	0.02528	0.0829	0.002722
548	0.03866	0.05494	0.01233
549	0.03847	0.05117	0.05935
550	0.01386	0.1062	0.03529
551	0.02367	0.02168	0.04435
552	0.01533	0.03597	0.01894
553	0.02634	0.05821	0.02272
554	0.02086	0.04792	0.001355
555	-0.000126	0.07719	0.03124
556	0.01027	0.04991	0.04195
557	0.01584	0.02525	0.02301
558	-0.02228	0.03896	0.01217
559	0.02475	0.02733	0.01736
560	0.01491	0.0515	0.03287
Auto Load Range A1 - D73

## Sheet: Result Summary
Result Overview
No Summary

## Sheet: Basic Information
Basic Information
	Software Version			SkanIt Software 6.1 RE for Microplate Readers RE, ver. 6.1.0.51

## Sheet: Program Information
Program Information
	Program Name			New Program2.skax
	Session Comments
	Software Version			SkanIt Software RE for Microplate Readers RE, ver. 6.1.0.51
	Execution Time			2022/3/17 19:49:44
	User			DESKTOP-BK9BVR7\JYK

## Sheet: Instrument Information
Instrument Information
	Name			Varioskan LUX
	ESW Version			1.00.38
	Optical Response Compensation			yes
	Serial Number			3020-81063
	Instrument Module/Component
	Filter
		Name of Optical Component		New filter
		Position of Optical Component		1
		Wavelength		620
		Bandwidth		10
		Definition Date and Time		2021/9/8 16:05:00
	Filter
		Name of Optical Component		New filter
		Position of Optical Component		2
		Wavelength		655
		Bandwidth		10
		Definition Date and Time		2021/9/8 16:05:00
		Module Name		LAT Module
		Module Serial Number		LL2106802
		Module Name		TRF Module
		Module Serial Number		LT210602
		Adapter Name for Plate		96-well adapter for plate without lid
		Adapter Number for Plate		2
		Incubator		yes
		Gas Control		no
		Top Optical Component		yes
		Bottom Optical Component		yes
		Pipette / Liquid Handler		yes

## Sheet: Program Settings
Program Settings
	Measurement Sequence			3
	Start-up Stabilization Delay			yes
	Temperature Check at Start [°C]			no
Fluorescence Spectrum 1
	Type			Emission Spectrum
	Wavelength Range
		Start [nm]		500
		End [nm]		560
		Step [nm]		1
	Fitting Wavelength			488
	Light Path			Top Read
	Excitation Bandwidth [nm]			5
	Dynamic Range			Automatic
	Measurement Time [ms]			100

## Sheet: Run Log
Run Log
	Time	Event	Message
	2022/3/17 19:49:44	Program New Program.skax Started
	2022/3/17 19:49:44	Temperature	23.8°C
	2022/3/17 19:49:45	Step Fluorescence Spectrum 1 Started
	2022/3/17 19:49:51	Temperature	23.8°C
	2022/3/17 19:50:13	Step Fluorescence Spectrum 1 Ended
	2022/3/17 19:50:13	Temperature	23.8°C
	2022/3/17 19:50:23	Program New Program.skax Ended

## Sheet: Plate and Sample
Name	Plate 1
Plate Template	ANSI/SBS Standard, 96-well
	1	2	3	4	5	6	7	8	9	10	11	12
A
B
C
D				Blank1	Blank1	Blank1
				Group 1	Group 1	Group 1
E
F
G
H
