# Supplementary material for: SplintR ligation-triggered in-situ rolling circle amplification on magnetic bead for accurate detection of circulating microRNAs
Source: PeerJ. 2025 Mar 11;13:e19082. doi: 10.7717/peerj.19082 (PMC11908441; doi:10.7717/peerj.19082)
Supplement: Supplemental Information 45 [file peerj-13-19082-s045.xlsx]

## Sheet: Fluorescence Spectrum
Detection Results
New Program.skax
2022/5/16 15:44:53
Fluorescence Spectrum 1
Em 520-620 nm，Ex 488 nm
Plate 1
	splintR
	1h+	1h+	1h+	1h-	2h+	2h+	2h+	2h-	3h+	3h+	3h+	3h-
Wavelength	Blank1 (D05)	Blank1 (D06)	Blank1 (D07)	Blank1 (D08)	Blank1 (E05)	Blank1 (E06)	Blank1 (E07)	Blank1 (E08)	Blank1 (F05)	Blank1 (F06)	Blank1 (F07)	Blank1 (F08)
520	0.2142	0.1559	0.1927	0.1783	0.2471	0.2422	0.2889	0.3591	0.2223	0.1588	0.1561	0.2503
521	0.2035	0.1757	0.1157	0.1783	0.2446	0.3702	0.2577	0.3385	0.213	0.2075	0.187	0.2181
522	0.1765	0.2329	0.1761	0.1808	0.2396	0.2723	0.2924	0.3278	0.2912	0.2715	0.2262	0.256
523	0.1794	0.1607	0.168	0.1841	0.2348	0.3548	0.2291	0.3208	0.2673	0.24	0.213	0.1775
524	0.1857	0.2032	0.1989	0.1413	0.2913	0.2825	0.3113	0.3675	0.2714	0.2904	0.1627	0.2621
525	0.1814	0.2317	0.2172	0.2432	0.2678	0.4368	0.3065	0.39	0.2453	0.2603	0.1609	0.2654
526	0.2014	0.2069	0.2263	0.2194	0.3132	0.3968	0.2866	0.3674	0.262	0.2564	0.2446	0.2646
527	0.2126	0.1764	0.2103	0.2716	0.3173	0.4217	0.3903	0.5087	0.304	0.3383	0.1734	0.2831
528	0.3153	0.2207	0.2412	0.1865	0.353	0.4396	0.381	0.4669	0.282	0.2142	0.2385	0.3029
529	0.2042	0.2048	0.263	0.2488	0.3608	0.5325	0.4172	0.4256	0.3399	0.2638	0.2721	0.2793
530	0.3259	0.3593	0.2513	0.2226	0.3563	0.5472	0.4274	0.5208	0.3561	0.3202	0.2013	0.2803
531	0.2483	0.2909	0.2946	0.2898	0.446	0.6773	0.4618	0.5895	0.3911	0.3293	0.2543	0.3093
532	0.2624	0.3295	0.2584	0.2432	0.3995	0.7021	0.463	0.6008	0.4068	0.3146	0.2779	0.3361
533	0.3035	0.2276	0.345	0.3386	0.4222	0.8198	0.4611	0.7084	0.4812	0.3418	0.2387	0.3198
534	0.3006	0.2711	0.4179	0.3081	0.5617	0.9956	0.434	0.691	0.4339	0.4373	0.3717	0.2853
535	0.3192	0.2512	0.4161	0.3466	0.5829	1.114	0.479	0.9498	0.4882	0.4181	0.3631	0.3411
536	0.3679	0.3302	0.4125	0.4235	0.5596	1.288	0.5127	0.9545	0.6448	0.4749	0.4051	0.3941
537	0.3211	0.4006	0.5451	0.4836	0.7152	1.267	0.547	1.185	0.7621	0.4976	0.4448	0.5145
538	0.4213	0.3438	0.6096	0.5908	0.7996	1.859	0.6633	1.402	0.8772	0.5439	0.3832	0.4524
539	0.5142	0.5221	0.817	0.631	0.9554	2.072	0.7458	1.568	1.015	0.6567	0.4577	0.518
540	0.5073	0.4899	0.8942	0.8389	1.108	2.307	0.8558	1.914	1.317	0.6194	0.6315	0.6346
541	0.7242	0.6133	1.002	0.8432	1.425	3.118	0.9636	2.213	1.227	0.901	0.7191	0.72
542	0.7715	0.6307	1.22	0.9855	1.604	3.517	1.094	2.985	1.63	0.8771	0.8367	0.8109
543	0.8754	0.726	1.532	1.201	2.07	4.286	1.219	3.317	1.951	1.087	0.9728	0.95
544	1.144	0.9978	1.894	1.511	2.353	5.015	1.282	3.894	2.388	1.24	1.281	1.01
545	1.297	1.154	2.087	1.909	2.759	6.474	1.819	4.86	2.976	1.445	1.511	1.27
546	1.611	1.48	2.904	2.094	3.167	7.52	2.255	5.746	3.183	1.814	1.66	1.665
547	1.736	1.696	3.074	2.536	3.982	8.739	2.522	6.547	4.185	1.958	1.965	1.908
548	2.18	1.95	3.859	2.762	4.848	10.69	2.961	8.46	4.836	2.261	2.557	2.197
549	2.768	2.283	4.184	3.43	5.552	12.1	3.282	9.296	5.613	2.622	2.877	2.441
550	2.968	2.757	4.778	4.376	6.601	14.35	3.803	11.34	6.316	3.088	3.182	2.916
551	3.535	2.968	5.545	4.804	7.519	17.15	4.275	12.8	7.514	3.524	3.71	3.187
552	3.863	3.374	6.605	5.568	8.764	19.87	5.02	15.4	8.812	4.162	4.373	3.959
553	4.312	3.836	7.652	6.237	9.831	22	6.008	17.22	10.35	4.743	5.146	4.311
554	4.888	4.339	8.692	7.045	11.19	25.27	6.486	19.07	10.85	5.1	5.503	5.175
555	5.763	4.91	10.04	7.904	12.77	28.21	7.838	21.52	12.67	6.022	6.258	5.736
556	6.195	5.558	10.84	8.811	14.22	32.19	7.965	24.75	14.38	6.804	7.083	6.36
557	7.2	6.141	11.86	10.14	15.8	34.9	9.112	27.4	16.13	7.384	7.997	6.804
558	8.02	7.053	13.24	10.56	17.42	39.15	10.59	29.92	17.65	8.569	8.728	7.947
559	8.708	7.455	14.4	11.49	19.35	42.7	10.92	33.24	19.79	9.149	9.239	8.766
560	9.07	8.081	15.58	13.15	20.38	46.07	11.94	35.41	20.35	10.15	10.62	9.075
561	9.688	8.734	17.6	14.08	22.58	50.28	12.77	38.92	22.26	10.58	10.75	9.596
562	10.68	9.229	18.75	14.79	23.72	52.88	14.05	40.51	23.45	11.23	11.63	10.7
563	10.95	9.818	19.07	15.74	24.99	54.61	14.25	42.58	25.36	12	12.85	11.59
564	11.48	10.34	20.5	16.75	27	58.06	15.96	45.9	26.87	12.57	13.59	11.89
565	12.2	10.38	20.68	17.27	28.52	61.59	15.66	46.97	28.21	13.56	14.2	12.3
566	12.26	11.05	21.75	17.73	28.57	62.86	16.79	48.69	28.97	13.44	14.08	12.66
567	12.96	11.01	22.88	18.8	29.88	65.59	16.96	50.67	29.73	14.05	14.74	13.14
568	13.11	11.47	23.16	19.2	30.39	66.31	17.94	51.08	29.76	14.57	14.76	13.37
569	13.33	11.42	23.58	18.55	30.82	67.21	17.62	52.03	29.98	14.5	15.35	13.85
570	13.27	11.57	23.9	19.17	31.04	69.1	18.05	52.65	32.26	15.28	15.42	14.32
571	13.98	11.89	22.95	19.46	30.83	68.61	17.62	52.12	31.06	15.3	15.31	13.91
572	13.87	11.42	23.04	19	31.28	67.11	17.93	51.92	30.86	14.83	15.41	13.84
573	13.41	11.39	23.23	18.79	30.67	67.92	17.56	51.71	30.81	14.48	14.62	14.24
574	13.11	11.35	23.03	19	30.28	65.93	17.6	50.98	30.63	14.69	15.13	13.94
575	12.78	11.48	22.6	17.94	29.66	65.38	17.3	50.22	29.68	14.03	14.74	13.74
576	12.46	10.93	21.84	17.44	28.94	62.87	17.17	48.6	28.71	14.05	14.68	12.82
577	12.01	10.92	21.54	16.88	27.97	61.66	16.12	47.45	27.73	13.75	14.01	12.86
578	11.44	9.887	20.88	16.89	27.64	58.77	16.16	45.63	27.74	13.05	13	12.8
579	11.51	9.919	19.97	16.26	26.43	58.3	15.62	44.27	26.57	12.43	12.91	12.23
580	10.48	9.531	19.16	15.56	25.24	56.43	14.55	42.82	25.4	12.35	12.59	11.87
581	10.14	9.059	18.2	14.94	24.03	52.67	14.22	40.68	23.3	11.43	12.25	10.91
582	9.939	9.285	17.65	14.46	23.79	51.11	13.56	39.34	23.52	11.62	11.59	10.91
583	9.927	8.352	17.23	13.77	22.81	47.57	12.75	37.56	22.3	11.2	11.21	10.64
584	9.005	7.618	15.98	12.91	21.12	46.56	11.96	35.55	20.95	10.21	10.73	9.674
585	8.891	7.606	15.45	12.57	20.33	44.01	11.48	34.75	19.78	9.852	10.64	9.623
586	8.497	7.487	15.13	11.77	19.59	42.99	11.04	33.21	19.03	9.483	10.33	9.633
587	7.456	7.067	13.81	11.58	18.43	40.15	10.89	30.98	17.72	8.985	9.53	8.29
588	7.364	6.553	13.19	10.62	17.66	38.43	10.5	29.78	17.55	8.718	8.935	8.294
589	7.371	6.307	12.55	10.43	17.27	36.78	9.504	28.27	16.84	8.597	8.337	7.774
590	6.808	6.099	12.14	9.754	16.01	34.94	9.472	27.4	15.77	8.051	8.028	7.611
591	6.404	5.767	11.78	9.471	15.38	32.87	8.545	25.43	15.15	7.72	7.952	7.374
592	6.426	5.938	11.01	9.01	14.98	31.37	8.552	24.27	14.61	6.738	7.411	6.708
593	5.983	5.248	10.32	8.918	13.9	30.54	7.854	23.06	13.64	7.096	7.13	6.591
594	5.937	4.852	10.14	8.056	13.35	28.28	7.786	22.85	13.59	6.63	6.648	6.342
595	5.7	4.809	9.403	7.873	13.05	27.53	7.545	21.03	12.6	6.372	6.627	5.992
596	5.336	4.561	9.337	7.459	12.08	26.35	7.468	19.81	11.91	5.943	6.211	5.824
597	4.962	4.786	8.184	7.322	11.39	24.89	6.659	19.94	11.61	5.832	6.132	5.273
598	4.756	4.056	8.394	6.895	10.91	24.4	6.218	18.55	10.98	5.222	5.294	5.116
599	4.493	3.74	8.21	6.791	10.4	22.85	6.373	17.42	10.31	5.448	5.506	4.847
600	4.368	3.708	7.806	6.437	10.02	23	6.003	16.99	10.25	4.883	5.367	5.14
601	4.284	3.627	7.44	6.128	10.14	22.01	5.667	16.6	9.714	5.131	5.199	4.363
602	4.166	3.465	7.718	5.782	9.639	20.89	5.233	15.96	9.464	4.393	4.899	4.636
603	3.983	3.447	7.11	5.779	9.297	20.5	5.094	15.54	9.317	4.623	4.501	4.453
604	4.099	3.446	6.906	5.463	9.071	18.97	5.024	15	9.165	4.261	4.504	4.608
605	3.383	3.26	6.608	5.525	8.447	19.36	4.93	14.72	8.786	3.971	4.565	4.3
606	3.518	3.169	6.33	4.999	8.074	18.61	4.77	13.57	8.429	3.943	4.427	4.156
607	3.686	3.115	6.343	5.26	8.236	18.14	5.433	14.25	8.147	4.368	4.192	4.206
608	3.397	2.98	6.083	4.99	8.093	17.16	5.174	13.33	7.907	3.93	3.781	4.105
609	3.678	2.788	6.127	4.743	8.236	17.43	4.721	13.24	7.43	3.646	3.992	3.549
610	3.355	2.99	5.678	5.156	7.929	17.04	4.469	12.88	7.757	3.766	3.949	3.711
611	3.467	2.635	5.82	4.536	7.853	16.17	4.331	12.98	7.593	3.745	3.958	3.478
612	3.115	3.054	5.88	4.655	7.305	16.86	4.378	13	7.481	3.91	3.887	3.475
613	3.145	2.605	5.813	4.153	7.674	16.19	4.498	12.43	7.294	3.841	3.733	3.483
614	3.39	2.75	5.657	4.482	7.392	15.98	4.063	12.54	7.416	3.717	3.604	3.684
615	3.235	2.701	5.407	4.242	7.141	16.08	3.898	12.97	7.497	3.552	3.715	3.294
616	3.188	2.878	5.378	4.743	7.747	15.31	4.24	12.34	7.257	3.617	3.73	3.089
617	3.372	2.709	5.058	4.788	7.328	15.33	4.239	11.72	6.788	3.539	3.736	3.367
618	2.957	2.863	5.002	4.37	7.02	15.65	3.802	11.59	6.957	3.595	3.463	3.316
619	2.883	2.534	5.271	4.443	6.971	15.38	4.128	11.37	6.585	3.237	3.506	3.24
620	3.275	2.544	5.256	4.426	7.037	14.31	3.995	11.76	6.719	3.338	3.36	3.126
Auto Load Range A1 - M113

## Sheet: Result Summary
Result Overview
No Summary

## Sheet: Basic Information
Basic Information
	Software Version			SkanIt Software 6.1 RE for Microplate Readers RE, ver. 6.1.0.51

## Sheet: Program Information
Program Information
	Program Name			New Program.skax
	Session Comments
	Software Version			SkanIt Software RE for Microplate Readers RE, ver. 6.1.0.51
	Execution Time			2022/5/16 15:44:53
	User			DESKTOP-BK9BVR7\JYK

## Sheet: Instrument Information
Instrument Information
	Name			Varioskan LUX
	ESW Version			1.00.38
	Optical Response Compensation			yes
	Serial Number			3020-81063
	Instrument Module/Component
	Filter
		Name of Optical Component		New filter
		Position of Optical Component		1
		Wavelength		620
		Bandwidth		10
		Definition Date and Time		2021/9/8 16:05:00
	Filter
		Name of Optical Component		New filter
		Position of Optical Component		2
		Wavelength		655
		Bandwidth		10
		Definition Date and Time		2021/9/8 16:05:00
		Module Name		LAT Module
		Module Serial Number		LL2106802
		Module Name		TRF Module
		Module Serial Number		LT210602
		Adapter Name for Plate		96-well adapter for plate without lid
		Adapter Number for Plate		2
		Incubator		yes
		Gas Control		no
		Top Optical Component		yes
		Bottom Optical Component		yes
		Pipette / Liquid Handler		yes

## Sheet: Program Settings
Program Settings
	Measurement Sequence			3
	Start-up Stabilization Delay			yes
	Temperature Check at Start [°C]			no
Fluorescence Spectrum 1
	Type			Emission Spectrum
	Wavelength Range
		Start [nm]		520
		End [nm]		620
		Step [nm]		1
	Fitting Wavelength			488
	Light Path			Top Read
	Excitation Bandwidth [nm]			5
	Dynamic Range			Automatic
	Measurement Time [ms]			100

## Sheet: Run Log
Run Log
	Time	Event	Message
	2022/5/16 15:44:53	Temperature	19.6°C
	2022/5/16 15:44:54	Program New Program.skax Started
	2022/5/16 15:44:59	Calibration	1.03602 46075
	2022/5/16 15:45:18	Temperature	19.6°C
	2022/5/16 15:46:18	Temperature	19.7°C
	2022/5/16 15:47:18	Temperature	19.7°C
	2022/5/16 15:47:48	Step Fluorescence Spectrum 1 Ended
	2022/5/16 15:47:48	Temperature	19.7°C
	2022/5/16 15:47:58	Program New Program.skax Ended

## Sheet: Plate and Sample
Name	Plate 1
Plate Template	ANSI/SBS Standard, 96-well
	1	2	3	4	5	6	7	8	9	10	11	12
A
B
C
D					Blank1	Blank1	Blank1	Blank1
					Group 1	Group 1	Group 1	Group 1
E					Blank1	Blank1	Blank1	Blank1
					Group 1	Group 1	Group 1	Group 1
F					Blank1	Blank1	Blank1	Blank1
					Group 1	Group 1	Group 1	Group 1
G
H
