# Supplementary material for: SplintR ligation-triggered in-situ rolling circle amplification on magnetic bead for accurate detection of circulating microRNAs
Source: PeerJ. 2025 Mar 11;13:e19082. doi: 10.7717/peerj.19082 (PMC11908441; doi:10.7717/peerj.19082)
Supplement: Supplemental Information 46 — Optimization-summary of RCA [file peerj-13-19082-s046.xlsx]

## Sheet: Sheet1
1H	1H	1H	1-	2H	2H	2H	2H-	3H	3H	3H	3H-
22.71	14	23.32	1.344	23.39	41.47	22.04	0.4927	25.23	19.68	15.26	3.179
