# Supplementary material for: SplintR ligation-triggered in-situ rolling circle amplification on magnetic bead for accurate detection of circulating microRNAs
Source: PeerJ. 2025 Mar 11;13:e19082. doi: 10.7717/peerj.19082 (PMC11908441; doi:10.7717/peerj.19082)
Supplement: Supplemental Information 49 [file peerj-13-19082-s049.xlsx]

## Sheet: Fluorescence Spectrum
Detection Results
New Program.skax
Fluorescence Spectrum 1
Em 520-620 nm，Ex 488 nm
Plate 1
Wavelength	1h	1h	1h	1h(-)	2h	2h	2h(-)	2h	3h	3h	3h	2h (-)
520	0.1546	0.1565	0.1292	0.1333	0.1309	0.1822	0.1024	0.1917	0.1681	0.1407	0.1314	0.1256
521	0.1515	0.1129	0.1563	0.1363	0.1483	0.1845	0.1203	0.1761	0.1055	0.1453	0.1628	0.1438
522	0.1741	0.1723	0.1568	0.1525	0.1347	0.2264	0.1366	0.1492	0.162	0.1322	0.1514	0.147
523	0.1771	0.1432	0.2077	0.1359	0.2227	0.1947	0.1246	0.1306	0.1648	0.1258	0.1887	0.1519
524	0.1608	0.1446	0.2329	0.1955	0.185	0.2635	0.1169	0.1866	0.152	0.1502	0.1633	0.1603
525	0.1963	0.1862	0.2013	0.169	0.1878	0.2465	0.1234	0.183	0.1757	0.1803	0.1844	0.2111
526	0.1837	0.1908	0.1849	0.227	0.2561	0.2019	0.1554	0.1856	0.2128	0.2195	0.1661	0.154
527	0.2302	0.2392	0.215	0.1614	0.1693	0.2197	0.1666	0.1791	0.1885	0.1872	0.2152	0.179
528	0.2325	0.2197	0.252	0.1341	0.232	0.2823	0.1586	0.213	0.2229	0.2039	0.1556	0.1046
529	0.2491	0.2473	0.2398	0.2192	0.2353	0.3051	0.1528	0.2834	0.2243	0.1717	0.1835	0.1576
530	0.2847	0.249	0.3017	0.1615	0.2775	0.3589	0.1608	0.277	0.2424	0.2679	0.1871	0.1114
531	0.2362	0.2629	0.2865	0.2206	0.2233	0.3927	0.1479	0.2684	0.3353	0.2208	0.2471	0.1668
532	0.3226	0.248	0.3553	0.1698	0.2836	0.3839	0.149	0.3334	0.2814	0.2444	0.2481	0.2012
533	0.2806	0.2542	0.3723	0.1604	0.3772	0.5105	0.1967	0.3914	0.2875	0.2982	0.3071	0.2448
534	0.367	0.2883	0.3705	0.1757	0.2519	0.5566	0.1414	0.372	0.3867	0.3579	0.264	0.1829
535	0.3756	0.3324	0.398	0.2144	0.4885	0.6777	0.1566	0.3206	0.4231	0.4253	0.3656	0.2076
536	0.4841	0.3403	0.3313	0.1792	0.4058	0.6895	0.19	0.4228	0.5382	0.4523	0.3218	0.2219
537	0.5966	0.3578	0.4828	0.2052	0.4826	0.7869	0.162	0.4735	0.5441	0.417	0.4063	0.18
538	0.6332	0.4499	0.5956	0.1377	0.5765	0.8641	0.1668	0.467	0.5692	0.5308	0.4871	0.2129
539	0.6846	0.5311	0.7094	0.1637	0.6562	1.144	0.1503	0.6812	0.7654	0.6249	0.468	0.2622
540	0.7878	0.5747	0.8661	0.1905	0.7571	1.404	0.1052	0.789	0.9076	0.6967	0.5074	0.1764
541	1.002	0.685	0.9739	0.1543	0.9942	1.771	0.1334	0.8607	1.135	0.8542	0.7092	0.2251
542	1.109	0.7555	1.155	0.1705	1.254	2.03	0.1529	1.194	1.297	0.9521	0.7604	0.3191
543	1.503	0.8395	1.372	0.2	1.329	2.379	0.19	1.384	1.583	1.143	0.9805	0.2672
544	1.439	1.157	1.726	0.2641	1.682	2.905	0.1384	1.556	1.837	1.08	0.9585	0.3073
545	2.114	1.274	1.973	0.2283	1.996	3.858	0.1115	2.02	2.196	1.754	1.525	0.2995
546	2.456	1.594	2.282	0.2462	2.442	3.822	0.1215	2.16	2.73	2	1.687	0.3942
547	2.663	1.678	2.702	0.2994	2.838	4.928	0.1345	2.662	2.863	2.538	1.867	0.4056
548	3.3	2.212	3.538	0.2763	3.372	6.106	0.1498	3.248	3.664	2.947	2.233	0.5664
549	3.747	2.517	4.1	0.3619	4.285	6.664	0.1242	3.695	4.516	3.266	2.618	0.5892
550	4.652	2.914	4.643	0.3711	4.71	7.894	0.2005	4.14	4.826	4.007	3.043	0.5535
551	5.52	3.184	5.473	0.5073	5.314	9.192	0.1901	5.32	5.852	4.246	3.447	0.844
552	6.515	3.771	6.354	0.4876	6.321	11.35	0.184	5.784	6.871	5.317	4.226	0.8486
553	7.357	4.611	7.318	0.5168	7.45	12.93	0.1829	6.704	7.641	5.874	4.6	1.009
554	8.234	5.001	8.317	0.529	7.912	13.96	0.2107	7.834	8.858	6.477	5.272	1.151
555	9.157	5.893	8.644	0.6534	9.683	16.46	0.219	8.704	9.966	7.945	6.053	1.391
556	10.17	6.389	10.25	0.67	10.92	18.71	0.2191	9.895	11.26	8.797	7.054	1.502
557	10.95	6.788	11.52	0.7829	11.42	20.2	0.3255	10.94	12.57	9.19	7.537	1.45
558	12.71	8.091	12.95	0.8016	13.59	23.19	0.2739	12.4	14.21	10.5	8.469	1.637
559	13.78	8.341	14.02	0.8879	14.82	24.86	0.263	12.75	15.06	11.19	9.181	1.863
560	15	9.251	15.18	0.9744	15.15	26.56	0.3831	14.52	16.9	12.62	9.957	2.053
561	16.06	9.792	16.52	1.061	16.97	29.43	0.3131	16.02	18.35	14.17	10.95	2.153
562	17.12	10.44	17.66	1.14	18.27	31.91	0.3515	16.53	19.04	14.27	12.03	2.261
563	18.41	10.88	18.4	1.242	19.19	32.96	0.379	17.5	20.46	15.56	11.92	2.522
564	19.59	11.45	19.75	1.234	20.52	35.53	0.3826	18.73	21.73	16.57	12.94	2.493
565	20.68	12.21	20.48	1.458	21.06	36.6	0.4198	20.05	22.8	17.28	13.99	2.893
566	20.6	12.39	21.15	1.425	21.98	38.26	0.4125	20.93	24.42	17.52	13.94	2.782
567	22.32	12.65	21.9	1.369	22.34	40.05	0.4282	21.01	23.87	19.17	14.23	3.025
568	21.76	12.94	22.26	1.499	23.42	40.01	0.5414	21.54	24.77	18.67	14.51	2.969
569	22.54	13.83	23.17	1.388	23.48	41.19	0.475	22.25	24.92	19.06	15.29	3.078
570	22.71	14	23.32	1.344	23.39	41.47	0.4927	22.04	25.23	19.68	15.26	3.179
571	22.68	14.11	23.57	1.437	23.95	40.75	0.4371	22.7	26.2	19.21	15.29	3.006
572	22.71	13.79	23.81	1.389	23.49	41.94	0.4689	22.39	24.88	19.63	15.18	2.847
573	22.38	14	22.67	1.375	24.13	40.26	0.4116	22.61	25.02	19.04	14.6	2.947
574	21.92	13.31	22.36	1.367	23.25	40.84	0.4113	21.69	24.95	19.2	15.24	3.267
575	21.78	12.58	22.44	1.484	22.68	40.33	0.398	21.92	25.23	19.06	14.72	2.839
576	20.8	12.53	22.21	1.268	22.81	39.08	0.4902	21.15	24.47	18.08	14.18	2.741
577	21.08	12.29	21.22	1.238	21.83	37.88	0.401	21.15	23.53	17.53	14.22	2.653
578	20.54	11.7	20.76	1.305	21.16	37.13	0.3731	19.96	21.75	17.56	13.12	2.784
579	19.43	11.91	19.99	1.195	20.72	35.95	0.507	19.4	21.86	16.41	13.25	2.35
580	18.79	11.29	19.52	1.054	19.86	34.47	0.4334	19.28	21.17	16.13	12.88	2.82
581	17.38	10.79	18.31	1.213	18.97	32.42	0.3287	17.99	20.01	15.88	12.42	2.501
582	17.25	10.23	17.12	1.142	18.45	30.99	0.3252	17.22	19.19	14.85	11.95	2.328
583	16.57	10.19	17.35	1.108	17.36	29.53	0.2471	16.58	18.92	14.23	11.2	2.186
584	15.58	9.503	15.91	1.057	16.4	27.91	0.4563	15.56	17.62	13.36	10.84	2.25
585	14.73	9.094	15.74	0.9807	16.24	27.36	0.3419	15.44	16.72	12.54	10.18	2.201
586	14.13	8.926	14.87	1.015	15.1	25.97	0.3218	14.99	16.01	12.43	9.819	2.041
587	13.7	8.028	14	0.9404	14.86	25.14	0.2682	13.66	15.69	11.95	9.004	1.867
588	12.79	7.793	13.01	0.8618	13.79	23.72	0.2649	13.35	15.21	11.56	8.798	1.817
589	12.66	7.321	12.29	0.8678	13.32	22.75	0.3324	12.93	14.31	10.72	8.68	1.68
590	11.9	7.484	11.9	0.6937	12.51	21.42	0.2192	12.07	13.07	10.23	8.16	1.671
591	11.55	6.546	11.8	0.7195	11.45	20.39	0.203	11.26	12.9	9.878	7.657	1.526
592	11.1	6.165	11.16	0.7248	11.57	20.54	0.1993	11.12	12	9.142	7.226	1.489
593	9.989	6.169	10.54	0.7472	10.92	18.96	0.2295	10.35	11.8	9.016	6.855	1.66
594	9.937	5.891	9.868	0.65	10.73	17.71	0.187	9.614	10.94	8.388	6.808	1.187
595	9.02	5.788	9.823	0.6228	9.812	17.43	0.2588	9.056	10.86	7.863	6.608	1.311
596	8.735	5.465	9.194	0.6075	9.133	16.05	0.1988	8.859	10.05	7.802	5.719	1.24
597	9.096	5.016	8.631	0.6032	9.375	15.94	0.1655	8.697	9.847	7.503	5.811	1.175
598	8.319	5.305	8.54	0.601	9.344	14.75	0.1301	8.139	9.099	7.267	5.825	1.113
599	7.741	4.817	8.006	0.5631	8.218	14.26	0.1886	8.016	8.947	6.754	5.379	1.083
600	7.839	4.788	7.482	0.6066	8.256	13.79	0.2486	7.775	8.59	6.775	5.456	1.041
601	7.158	4.677	7.204	0.5088	7.725	13.2	0.1456	7.486	8	6.495	4.664	1.056
602	7.135	4.203	7.323	0.4174	7.419	12.53	0.1324	7.511	7.716	5.802	4.879	0.9677
603	6.67	3.931	6.672	0.3675	7.116	12.3	0.1575	6.82	7.831	5.704	4.813	0.8516
604	6.835	3.923	6.509	0.4732	7.248	12.08	0.1665	6.758	7.723	5.927	4.755	0.9538
605	6.342	4.026	6.486	0.4374	6.929	11.2	0.1074	6.686	7.555	5.423	4.121	0.9536
606	6.391	3.814	6.533	0.4046	6.585	11.26	0.1787	6.183	7.003	5.574	4.327	0.7528
607	6.194	3.602	6.287	0.4121	6.321	10.79	0.1159	5.922	7.131	5.513	4.131	0.8727
608	6.006	3.647	6.359	0.3898	6.407	10.98	0.1201	5.644	6.593	5.465	4.211	0.8992
609	5.679	3.651	6.141	0.4168	6.37	10.53	0.1239	6.044	6.435	4.894	4.059	0.8301
610	5.621	3.602	5.982	0.4238	5.981	10.66	0.1735	5.42	6.055	4.962	3.972	0.9021
611	5.594	3.257	5.53	0.3512	5.705	10.6	0.09427	5.543	6.511	5.078	3.725	0.8649
612	5.525	3.237	5.384	0.3951	5.982	9.717	0.1199	5.635	6.134	4.812	3.684	0.7571
613	5.414	3.353	5.715	0.3809	5.795	10.18	0.1439	5.657	5.991	4.86	3.569	0.6063
614	5.567	3.339	5.63	0.4604	5.991	10.02	0.08902	5.506	6.431	5.072	3.71	0.7937
615	5.25	3.179	5.41	0.3613	5.939	10.09	0.07298	4.99	5.929	4.714	3.576	0.7535
616	5.033	3.245	5.433	0.4077	5.847	9.543	0.1277	5.119	6.013	4.356	3.747	0.743
617	5.254	3.311	5.248	0.3478	5.539	9.753	0.161	5.269	5.871	4.411	3.497	0.8619
618	5.136	3.21	5.407	0.3567	5.805	9.684	0.2078	5.283	6.031	4.717	3.385	0.7704
619	5.195	3.393	5.329	0.3475	5.933	9.428	0.1123	5.219	5.643	4.412	3.384	0.7077
620	4.892	3.263	5.408	0.3644	5.35	9.025	0.09154	4.97	5.685	4.329	3.259	0.7238
Auto Load Range A1 - E113

## Sheet: Result Summary
Result Overview
No Summary

## Sheet: Basic Information
Basic Information
	Software Version			SkanIt Software 6.1 RE for Microplate Readers RE, ver. 6.1.0.51

## Sheet: Program Information
Program Information
	Program Name			New Program.skax
	Session Comments
	Software Version			SkanIt Software RE for Microplate Readers RE, ver. 6.1.0.51
	Execution Time			2022/5/9 17:21:40
	User			DESKTOP-BK9BVR7\JYK

## Sheet: Instrument Information
Instrument Information
	Name			Varioskan LUX
	ESW Version			1.00.38
	Optical Response Compensation			yes
	Serial Number			3020-81063
	Instrument Module/Component
	Filter
		Name of Optical Component		New filter
		Position of Optical Component		1
		Wavelength		620
		Bandwidth		10
		Definition Date and Time		2021/9/8 16:05:00
	Filter
		Name of Optical Component		New filter
		Position of Optical Component		2
		Wavelength		655
		Bandwidth		10
		Definition Date and Time		2021/9/8 16:05:00
		Module Name		LAT Module
		Module Serial Number		LL2106802
		Module Name		TRF Module
		Module Serial Number		LT210602
		Adapter Name for Plate		96-well adapter for plate without lid
		Adapter Number for Plate		2
		Incubator		yes
		Gas Control		no
		Top Optical Component		yes
		Bottom Optical Component		yes
		Pipette / Liquid Handler		yes

## Sheet: Program Settings
Program Settings
	Measurement Sequence			3
	Start-up Stabilization Delay			yes
	Temperature Check at Start [°C]			no
Fluorescence Spectrum 1
	Type			Emission Spectrum
	Wavelength Range
		Start [nm]		520
		End [nm]		620
		Step [nm]		1
	Fitting Wavelength			488
	Light Path			Top Read
	Excitation Bandwidth [nm]			5
	Dynamic Range			Automatic
	Measurement Time [ms]			100

## Sheet: Run Log
Run Log
	Time	Event	Message
	2022/5/9 17:21:40	Program New Program.skax Started
	2022/5/9 17:21:40	Temperature	23.9°C
	2022/5/9 17:21:41	Step Fluorescence Spectrum 1 Started
	2022/5/9 17:21:46	Calibration	1.0449 46749
	2022/5/9 17:22:31	Temperature	24.0°C
	2022/5/9 17:22:44	Step Fluorescence Spectrum 1 Ended
	2022/5/9 17:22:44	Temperature	24.0°C
	2022/5/9 17:22:54	Program New Program.skax Ended

## Sheet: Plate and Sample
Name	Plate 1
Plate Template	ANSI/SBS Standard, 96-well
	1	2	3	4	5	6	7	8	9	10	11	12
A
B
C
D
E					Blank1	Blank1	Blank1	Blank1
					Group 1	Group 1	Group 1	Group 1
F
G
H
