# Supplementary material for: SplintR ligation-triggered in-situ rolling circle amplification on magnetic bead for accurate detection of circulating microRNAs
Source: PeerJ. 2025 Mar 11;13:e19082. doi: 10.7717/peerj.19082 (PMC11908441; doi:10.7717/peerj.19082)
Supplement: Supplemental Information 50 [file peerj-13-19082-s050.xlsx]

## Sheet: Fluorescence Spectrum
Detection Results
New Program.skax
2022/3/17 19:51:29
Fluorescence Spectrum 1
Ex 490-600 nm，Em 488 nm
Plate 1
Wavelength	splintR 1h	splintR 0.5h	splintR 3h
490	54870	229200	9907
491	44610	205500	9392
492	35770	180900	8694
493	27300	150600	7765
494	17870	107800	6172
495	10670	74640	4782
496	5552	46080	3427
497	2785	24720	2277
498	1349	8398	1212
499	763.8	2442	691.3
500	406.3	612	376.2
501	200.4	261.3	190.5
502	73.5	94.69	71.32
503	30.56	37.9	30.59
504	11.44	13.43	11.27
505	3.899	4.055	3.225
506	0.6857	0.7484	0.4286
507	0.2555	0.2381	0.2263
508	0.257	0.174	0.1472
509	0.1422	0.2674	0.1491
510	0.1996	0.1723	0.105
511	0.1423	0.164	0.1067
512	0.1811	0.1251	0.1195
513	0.1488	0.1679	0.1483
514	0.2121	0.09283	0.1379
515	0.1334	0.1115	0.1042
516	0.1426	0.08611	0.1112
517	0.09181	0.09439	0.1194
518	0.09302	0.1477	0.08013
519	0.09444	0.08142	0.07246
520	0.1575	0.08409	0.09494
521	0.1426	0.08424	0.09192
522	0.1067	0.07676	0.08542
523	0.06352	0.1012	0.0547
524	0.07666	0.07415	0.08468
525	0.135	0.05864	0.1117
526	0.09564	0.0541	0.1107
527	0.06463	0.0564	0.07995
528	0.1014	0.06244	0.04925
529	0.07166	0.1139	0.08631
530	0.05589	0.04719	0.07323
531	0.08196	0.09386	0.08523
532	0.06928	0.06088	0.04039
533	0.09165	0.1384	0.08708
534	0.09011	0.1018	0.06119
535	0.05963	0.05077	0.1042
536	0.06296	0.08718	0.04451
537	0.04776	0.09509	0.05244
538	0.07558	0.08845	0.0644
539	0.05056	0.1248	0.07069
540	0.05464	0.08521	0.0689
541	0.04756	0.06925	0.06552
542	0.05687	0.06107	0.06495
543	0.02218	0.04368	0.03112
544	0.0419	0.06684	0.0221
545	0.04649	0.05009	0.07202
546	0.05624	0.08786	0.02911
547	0.04475	0.05324	0.02758
548	0.1009	0.04498	0.02023
549	0.01586	0.06943	0.006512
550	0.0219	0.05339	0.05689
551	0.05962	0.01492	0.04604
552	0.02259	0.03074	0.008459
553	-0.005878	0.03566	0.02797
554	0.02229	-0.009828	-0.01257
555	-0.0003334	0.03103	0.00719
556	0.01621	0.01282	0.005242
557	-0.004375	-0.002128	0.02534
558	0.01559	0.03235	-0.004653
559	0.01972	-0.009912	0.003035
560	0.01904	-0.01253	0.004382
561	-0.01111	0.02185	0.001889
562	0.003291	-0.002623	-0.01384
563	0.01601	0.03762	0.02262
564	0.0261	-0.008803	-0.008605
565	-0.002631	0.04345	-0.01044
566	0.01065	0.03409	-0.003953
567	0.02485	0.004949	-0.004631
568	0.01473	0.01473	-0.01483
569	0.02526	0.04196	0.02645
570	0.02564	0.005142	0.02029
571	0.002208	-0.002093	0.01813
572	0.009984	0.01458	0.01235
573	0.0001288	-0.003617	0.01103
574	0.0228	0.001518	-0.01242
575	0.02563	-0.002212	0.01856
576	0.02052	0.01666	-0.01201
577	0.01773	-0.009433	-0.001662
578	-0.0008385	0.002752	0.06236
579	0.04827	0.01246	0.03008
580	0.03505	0.02904	-0.01119
581	-0.0267	0.03747	-0.001922
582	-0.008111	-0.03568	-0.009666
583	0.007184	-0.009321	-0.003281
584	0.06342	0.01047	-0.03375
585	-0.01479	0.02762	0.0508
586	0.01522	0.01432	-0.02613
587	0.03014	-0.00408	0.0069
588	-0.007471	0.01259	-0.005257
589	-0.05087	0.006478	0.01812
590	-0.02064	0.04476	0.01334
591	0.003767	0.01203	-0.001297
592	0.03394	0.00695	-0.001999
593	0.05442	0.07358	0.02591
594	0.07098	0.02902	0.00872
595	0.09203	0.02918	0.03516
596	0.04631	0.05634	0.05462
597	0.00742	0.06964	0.1156
598	0.02914	0.03295	0.06002
599	0.06485	0.1272	0.09811
600	0.1676	0.1145	0.04815
Auto Load Range A1 - D123

## Sheet: Result Summary
Result Overview
No Summary

## Sheet: Basic Information
Basic Information
	Software Version			SkanIt Software 6.1 RE for Microplate Readers RE, ver. 6.1.0.51

## Sheet: Program Information
Program Information
	Program Name			New Program.skax
	Session Comments
	Software Version			SkanIt Software RE for Microplate Readers RE, ver. 6.1.0.51
	Execution Time			2022/3/17 19:51:29
	User			DESKTOP-BK9BVR7\JYK

## Sheet: Instrument Information
Instrument Information
	Name			Varioskan LUX
	ESW Version			1.00.38
	Optical Response Compensation			yes
	Serial Number			3020-81063
	Instrument Module/Component
	Filter
		Name of Optical Component		New filter
		Position of Optical Component		1
		Wavelength		620
		Bandwidth		10
		Definition Date and Time		2021/9/8 16:05:00
	Filter
		Name of Optical Component		New filter
		Position of Optical Component		2
		Wavelength		655
		Bandwidth		10
		Definition Date and Time		2021/9/8 16:05:00
		Module Name		LAT Module
		Module Serial Number		LL2106802
		Module Name		TRF Module
		Module Serial Number		LT210602
		Adapter Name for Plate		96-well adapter for plate without lid
		Adapter Number for Plate		2
		Incubator		yes
		Gas Control		no
		Top Optical Component		yes
		Bottom Optical Component		yes
		Pipette / Liquid Handler		yes

## Sheet: Program Settings
Program Settings
	Measurement Sequence			3
	Start-up Stabilization Delay			yes
	Temperature Check at Start [°C]			no
Fluorescence Spectrum 1
	Type			Emission Spectrum
	Wavelength Range
		Start [nm]		490
		End [nm]		600
		Step [nm]		1
	Fitting Wavelength			488
	Light Path			Top Read
	Excitation Bandwidth [nm]			5
	Dynamic Range			Automatic
	Measurement Time [ms]			100

## Sheet: Run Log
Run Log
	Time	Event	Message
	2022/3/17 19:51:29	Program New Program.skax Started
	2022/3/17 19:51:29	Temperature	23.8°C
	2022/3/17 19:51:30	Step Fluorescence Spectrum 1 Started
	2022/3/17 19:51:51	Temperature	23.8°C
	2022/3/17 19:52:20	Step Fluorescence Spectrum 1 Ended
	2022/3/17 19:52:20	Temperature	23.7°C
	2022/3/17 19:52:30	Program New Program.skax Ended

## Sheet: Plate and Sample
Name	Plate 1
Plate Template	ANSI/SBS Standard, 96-well
	1	2	3	4	5	6	7	8	9	10	11	12
A
B
C
D				Blank1	Blank1	Blank1
				Group 1	Group 1	Group 1
E
F
G
H
